# 1 **CREB repressor in mushroom body enhances *Drosophila* LTM formation**

## 2 **Authors**

3 Chun-Chao Chen,<sup>1,\*</sup> Hsuan-Wen Lin,<sup>1</sup> Kuan-Lin Feng,<sup>2</sup> Ruei-Yu Jhang,<sup>1,3</sup> Linyi Chen,<sup>1,3</sup> J. Steven  
4 de Belle<sup>4,5,6</sup>, Tim Tully,<sup>1,2\*</sup> and Ann-Shyn Chiang,<sup>1,2,7,8,9,10\*</sup>

## 6 **Affiliations**

7 <sup>1</sup>Brain Research Center, National Tsing Hua University, Hsinchu 30013, Taiwan.

8 <sup>2</sup>Institute of Systems Neuroscience and Department of Life Science, National Tsing Hua  
9 University, Hsinchu 30013, Taiwan.

10 <sup>3</sup>Department of Medical Science and Institute of Molecular Medicine, National Tsing Hua  
11 University, Hsinchu 30013, Taiwan.

12 <sup>4</sup>Department of Psychological Sciences, University of San Diego, San Diego, CA, USA.

13 <sup>5</sup>School of Life Sciences, University of Nevada, Las Vegas, NV, USA.

14 <sup>6</sup>Acrovirt LLC, Las Vegas, NV, USA.

15 <sup>7</sup>Kaohsiung Medical University, Kaohsiung 80708, Taiwan.

16 <sup>8</sup>National Health Research Institutes, Zhunan 35053, Taiwan.

17 <sup>9</sup>China Medical University, TaiChung 40402, Taiwan.

18 <sup>10</sup>Kavli Institute for Brain and Mind, University of California at San Diego, La Jolla, CA 92093-  
19 0526, USA.

22 \*Correspondence should be addressed to C.C.C ([chenchunchao@gapp.nthu.edu.tw](mailto:chenchunchao@gapp.nthu.edu.tw)), T.T.  
23 ([ttully@gapp.nthu.edu.tw](mailto:ttully@gapp.nthu.edu.tw)) or A.S.C. ([aschiang@life.nthu.edu.tw](mailto:aschiang@life.nthu.edu.tw)).

36 **Abstract**

37 Long-term memory (LTM) requires learning-induced synthesis of new proteins allocated to specific  
38 neurons and synapses in a neural circuit. Not all learned information, however, becomes permanent  
39 memory. How the brain gates relevant information into LTM remains unclear. In *Drosophila* adults,  
40 a single training session in an olfactory aversive task is not sufficient to induce protein synthesis-  
41 dependent LTM. Instead, multiple spaced training sessions are required. Here, we report that initial  
42 learning induces neural activity in the early  $\alpha/\beta$  subset of Kenyon cells of the mushroom body (MB),  
43 and output from these neurons inhibits LTM formation. Specifically in response to spaced training,  
44 Schnurri activates CREBB expression which then appears to suppress the inhibitory output from  
45 MB. One training session can enhance LTM formation when this inhibitory effect is relieved. We  
46 propose that learning-induced protein synthesis and spaced training-induced CREBB act  
47 antagonistically to modulate output from early  $\alpha/\beta$  MB neurons during LTM formation.

48

49

50

51

52

53

54

55

56

57

58

59

60

61 **MAIN TEXT**

62 **Introduction**

63 *Drosophila* continues to demonstrate its utility as a model system to study memory, more  
64 than four decades after the first mutant was described (*Dudai et al., 1976*). Genetic dissection of  
65 olfactory aversive memory formation using various single-gene mutants has revealed at the  
66 behavioral level several distinct temporal phases, including short-term memory (STM), middle-  
67 term memory (MTM), anesthesia-resistant memory (ARM) and long-term memory (LTM) (*Tully*  
68 *et al., 1994; Tully et al., 1990; Tully, 1996; Quinn and Dudai, 1976*). The initial learning event  
69 (acquisition) after a single training session (1x) appears to induce STM, MTM and ARM, while  
70 spaced training (10 training sessions with 15 min rest intervals between each, 10xS) appears  
71 uniquely required to induce LTM consolidation. Manipulations of several of these “memory genes”  
72 also have established cases where memory formation is either impaired or enhanced, revealing bi-  
73 directional biochemical modulation of memory formation (*Yin et al., 1994; Yin et al., 1995a; Ge et*  
74 *al., 2004; Presente et al., 2004; Wu et al., 2007; Pavlopoulos et al., 2008; Huang et al., 2012; Tubon*  
75 *et al., 2013; Fropp et al., 2014; Lee et al., 2018; Scheunemann et al., 2018*).

76 As the neural substrates of olfactory memory formation are elucidated in flies, a remarkable  
77 “memory circuit” is emerging. Olfactory information delivered from the antennal lobe (AL) by  
78 projection neurons (PN) and foot shock reinforcement delivered by dopaminergic neurons (DAN)  
79 both converge on mushroom body (MB) neurons in the central brain where their coincidence  
80 triggers cascading cellular events that underlie learning (*Dubnau and Chiang 2013; Perisse et al.,*  
81 *2013; Davis, 2015; Cognigni et al., 2018*). MBs play a predominant role in subsequent memory  
82 formation, together with several groups of extrinsic MB neurons. Sequential genetically-defined  
83 memory phases map onto distinct subpopulations of these neurons. STM involves  
84  $\gamma$ ,  $\alpha'/\beta'$  and  $\alpha/\beta$  neurons and two classes of MB output neurons (MBON: MB-M4, MB-M6) (*Blum*  
85 *et al., 2009; Scheunemann et al., 2012; Bouzaiane et al., 2015*). MTM involves neural activity in  $\gamma$ ,

86  $\alpha/\beta$  and MB-V2 neurons (*Blum et al., 2009; Scheunemann et al., 2012; Bouzaiane et al., 2015*).

87 ARM requires neural activity in MB  $\gamma$ ,  $\alpha'/\beta'$ ,  $\alpha/\beta$  neurons, dorsal paired medial (DPM) neurons,

88 anterior paired lateral (APL) neurons, DAN and four different MB output neurons (MB-M4, MB-

89 M6, MB-V2, MBON- $\beta 2\beta'2a$ ) (*Lee et al., 2011; Knappek et al., 2011; Placais et al., 2012; Wu et al.,*

90 *2013; Bouzaiane et al., 2015; Yang et al., 2016; Scholz-Kornehl and Schwärzel, 2016; Kotoula et*

91 *al., 2017; Shyu et al., 2019*). LTM involves neural activity in late MB  $\alpha/\beta$  neurons with output from

92 DPM, serotonergic projection neurons (SPN) and three classes of MBONs (MB-V3, MB-M4,

93 MBON- $\gamma 3, \gamma 3\beta'1$ ). Cyclic AMP response element binding protein (CREB)-dependent consolidation

94 of LTM also requires activity in dorsal anterior lateral (DAL) neurons (*Chen et al., 2012; Pai et al.,*

95 *2013; Tonoki and Davis 2015; Bouzaiane et al., 2015; Wu et al., 2017; Scheunemann et al., 2018*).

96 Finally, memory retrieval depends on neural activity in DAL, pioneer  $\alpha/\beta$  neurons and four classes

97 of MBONs (MB-V2, MB-V3, MB-M4, MBON- $\gamma 3, \gamma 3\beta'1$ ) (*Séjourné et al., 2011; Chen et al., 2012;*

98 *Pai et al., 2013; Bouzaiane et al., 2015; Wu et al., 2017*).

99 Here, we describe another enlightening property of olfactory memory in *Drosophila*: inhibition

100 of LTM formation at the circuit level. Output from the early  $\alpha/\beta$  subpopulation of MB neurons

101 appears initially to inhibit LTM formation, but with spaced training, transcription of *crebB* (*dcreb2*,

102 repressor) is induced therein, apparently reducing neural output therefrom and thereby enabling

103 LTM formation. Thus, persistent olfactory memory formation appears modulated or “gated” at the

104 level of neural activity in early  $\alpha/\beta$  MB neurons. These observations presage the need for a more

105 general deconvolution of biochemical mechanisms into distinct neuronal subtypes within a memory

106 circuit.

107

## 108 **Results**

### 109 **Learning inhibits LTM**

110 Sixty of the single-gene mutants mentioned above were generated using transposon mutagenesis  
111 and were screened for impairments of memory one day after 10xS training ([Dubnau et al., 2003](#)).  
112 Twenty-two of these lines carried *P-Gal4* enhancer traps, which enabled us to drive targeted  
113 inducible expression of a temperature-sensitive *Ricin<sup>CS</sup>* transgene and then block protein synthesis  
114 after 10xS ([Chen et al., 2012](#); [Pai et al., 2013](#); [Wu et al., 2017](#)). With protein synthesis inhibited in  
115 this manner, we found impairments of 1-day memory in nine of these lines ([figure supplement 1A-](#)  
116 [C](#); [table supplement 1](#)) ([Tully et al., 1994](#); [Yin et al., 1994](#)). Remarkably, GFP was expressed in  
117 DAL neurons in all nine cases ([figure supplement 1B](#)), an observation that contributed to our  
118 characterization of DAL neurons extrinsic to the MB as *bona fide* “LTM neurons” ([Chen et al.,](#)  
119 [2012](#)). Two of the enhancer-trap memory mutants that we screened were particularly informative.  
120 In *ummitza* flies, GFP was expressed in DAL neurons but very weakly in MB, and 1-day memory  
121 after 10xS was impaired. Conversely in *norka* flies, GFP was expressed in MB but not in DAL  
122 neurons and 1-day memory after 10xS was normal.

123 What then might be going on in the seven enhancer-trap mutants with normal memory and with  
124 GFP expression in both MB & DAL neurons ([Figure 1A](#); [figure supplement 1A](#))? First, we  
125 confirmed that active *Ricin<sup>CS</sup>* inhibition of protein synthesis in different subsets of MB neurons did  
126 not impair 1-day memory after 10xS ([figure supplement 2A-B and 3](#)). In contrast, 1-day memory  
127 after 10xS was impaired by active *Ricin<sup>CS</sup>* in DAL or MB-V3 neurons ([Chen et al., 2012](#); [Pai et al.,](#)  
128 [2013](#); [Wu et al., 2017](#)) but was normal after massed training (10x training sessions with no rest  
129 intervals; 10xM) or in control flies with inactive *Ricin<sup>CS</sup>* (18 °C) ([figure supplement 3](#)).

130 We next tested the hypothesis that inhibition of protein synthesis in MB might enhance LTM  
131 formation, thereby off-setting the impairment produced by blocking protein synthesis in DAL  
132 neurons. Using *cry-Gal80* or *MB-Gal80*, we blocked transgenic *Ricin<sup>CS</sup>* expression outside (i.e.  
133 DAL neurons) or inside of MB, respectively, in these seven enhancer-trap memory lines ([Figure](#)

134 **1B-C)** and then subjected them to suboptimal 3xS training. Surprisingly, LTM formation was  
135 *enhanced* in all seven lines by *cry-Gal80* subtraction (**Figure 1D-F**).

136 The MB is composed of approximately 2,500 intrinsic neurons (Kenyon cells; KCs)  
137 developmentally derived from four neuroblasts and distinguished by their projections that form the  
138  $\gamma$ ,  $\alpha'/\beta'$  and  $\alpha/\beta$  lobes (*Ito et al., 1997; Zhu et al., 2003; Lin et al., 2007*). We looked among these  
139 neuronal subpopulations to identify where LTM enhancement might reside (**Figure 2; figure**  
140 **supplement 2A**). Active Ricin was expressed in all KCs or in  $\gamma$ ,  $\alpha'/\beta'$ , or  $\alpha/\beta$  neurons separately.  
141 Enhanced LTM was observed after 3xS only in  $\alpha/\beta$  neurons, which were previously shown to have  
142 a role in LTM formation (*Blum et al., 2009; Yu et al., 2006*) (**Figure 2A**).

143 The  $\alpha/\beta$  neurons are subdivided further into three types: pioneer  $\alpha/\beta$ , early  $\alpha/\beta$  and late  $\alpha/\beta$   
144 neurons based on their birth sequences (*Zhu et al., 2003; Lin et al., 2007; Tanaka et al., 2008; Aso*  
145 *et al., 2014*). When active Ricin was expressed in these three subpopulations separately, we  
146 observed enhanced LTM after 3xS only when protein synthesis was blocked in early  $\alpha/\beta$  neurons  
147 (**Figure 2A, left**). Enhanced LTM lasted for at least 4 days (**Figure 2A, right**) and was not observed  
148 in control flies (inactive Ricin<sup>CS</sup>) after 3xS training or in flies with active Ricin<sup>CS</sup> after 3xM (**figure**  
149 **supplement 2C**). Blocking protein synthesis in early  $\alpha/\beta$  neurons enhanced 1- and 4-day memories  
150 even after only 1x training (**Figure 2B**). Notably, LTM enhancement after 1x training required two  
151 copies of transgenic Ricin<sup>CS</sup>. Together, these results indicate that inhibition of protein synthesis in  
152 early  $\alpha/\beta$  neurons yields a *bona fide* enhancement of LTM formation.

153 We next inquired about the most effective time after training when inhibition of protein synthesis  
154 would enhance LTM. Ricin<sup>CS</sup> in early  $\alpha/\beta$  neurons was activated for 12 h in a series of time  
155 windows staggered by 2 h during the first 24 h after 1x training (*Chen et al., 2012; Wu et al., 2017*).  
156 LTM was enhanced when protein synthesis was blocked beginning from 0- to 4-h but not from 6-  
157 to 12-h after training (**Figure 3A**). Shortening the inhibition period to 3 h, we resolved the window  
158 of protein-synthesis-dependent LTM inhibition to the first 6 h after training (**Figure 3B**).

159

## 160 **Output from early $\alpha/\beta$ neurons inhibits LTM**

161 To address whether the inhibitory effect on LTM in early  $\alpha/\beta$  lobes depends on their neural output,  
162 we blocked synaptic transmission from pioneer  $\alpha/\beta$ , late  $\alpha/\beta$  or early  $\alpha/\beta$  neurons using *UAS-shi<sup>ts</sup>*  
163 (*Dubnau et al., 2001; McGuire et al., 2001*). In these experiments we found that 1- and 4-day  
164 memory after 3xS training were enhanced by this manipulation in early  $\alpha/\beta$  (*Figure 4A-B*), but not  
165 in pioneer or in late  $\alpha/\beta$  neurons (*figure supplement 4A*). Interestingly, we also established that  
166 LTM after 3xS was enhanced when synaptic transmission was blocked from early  $\alpha/\beta$  during the  
167 first 8 h period after training but not 9-24 h after training or during 1-day memory retrieval (*Figure*  
168 *4A*). Thus, this temporal requirement for synaptic transmission from early  $\alpha/\beta$  neurons corresponds  
169 to the requirement for protein synthesis (*Figure 3*). We confirmed these results using two additional  
170 *Gal4* drivers expressing specifically in early  $\alpha/\beta$  neurons (*Figure 4C; figure supplement 2A*) and  
171 observed normal 1-day memory after 3xM (*Figure 4B, middle*) as in control flies carrying *UAS-*  
172 *shi<sup>ts</sup>* alone, *Gal4* alone (*Figure 4B, right*) or at the permissive temperature for *shi<sup>ts</sup>* (*Figure 4A, left*  
173 *and 4C, right*). Finally, we established that LTM after 10xS training was not impaired when neural  
174 output from early  $\alpha/\beta$  neurons was blocked (*figure supplement 4B*). Together, these results indicate  
175 that, in the absence of spaced training, neural output from early  $\alpha/\beta$  neurons inhibits LTM formation.

176 To examine the influence of early  $\alpha/\beta$  neuron membrane excitability on memory, we used ectopic  
177 expression of either transgenic hyperexcitators (*UAS-Shaw<sup>DN</sup>*, a dominant-negative Shaw potassium  
178 channel and *UAS-NaChBac*, a sodium channel) or hypoexcitators (*UAS-Shaw*, a Shaw potassium  
179 channel and *UAS-Kir2.1::GFP*, an inward-rectifying potassium channel *Venken et al., 2011*).  
180 Temporal control of these transgenes was enabled using a *tub-Gal80<sup>ts</sup>* transgene (conditional  
181 expression of Gal80 suppresses Gal4 expression at 18 °C but not at 30°C *McGuire et al., 2003*).  
182 We found that increasing membrane excitability of early  $\alpha/\beta$  neurons impaired 1-day memory after

183 10xS training (Figure 5A, left) without affecting (1) memory after 1x training (fig. S5A), (2) 1-day  
184 memory after 10xM training (figure supplement 5B) or (3) 1-day memory after 10xS training when  
185 flies were kept at permissive temperature (18°C) (figure supplement 5C). This inhibitory effect  
186 appears to be complete, because inhibition of protein synthesis by feeding flies cycloheximide  
187 (CXM) did not further reduce 1-day LTM after 10xS training (Figure 5A, right). Decreasing  
188 membrane excitability of early  $\alpha/\beta$  neurons with ectopic expression of hypoexciter transgenes, on  
189 the other hand, enhanced both 1- and 4-day memory after 1x training (Figure 5B, left and middle),  
190 whereas enhancement of 1-day memory was not observed in control transgenic flies kept at the  
191 permissive temperature (18°C) (Figure 5B, right). We also found normal 1-day memory in these  
192 transgenic flies after 10xS training (Figure 5C). Thus, sufficient spaced training appeared to occlude  
193 the enhancing effects on LTM formation of decreased membrane excitability in early  $\alpha/\beta$  neurons.  
194 These data further support the notion that neural activity from early  $\alpha/\beta$  neurons inhibits LTM  
195 formation downstream (Dubnau and Chiang 2013; Pai, et al., 2013; Wu et al., 2017).

196

### 197 **cAMP signaling in early $\alpha/\beta$ neurons enhances LTM**

198 Neural excitability is suggested to be modulated by cAMP signaling (Davis et al., 1998; Baines,  
199 2003), which in MB is also involved in LTM formation (Blum et al., 2009). Accordingly, we  
200 inducibly overexpressed *rutabaga*<sup>+</sup> (*rut*<sup>+</sup>) adenylyl cyclase (AC) or constitutively active *cAMP*-  
201 *dependent protein kinase* (*Pka*<sup>act1</sup>) transgenes in early  $\alpha/\beta$  neurons and found that 1-day memory  
202 after 1x training was enhanced to levels normally seen after 10xS in both cases (Figure 6A and 7A).  
203 Moreover, inducible RNAi knockdowns of these genes impaired 1-day memory after 10xS (Figure  
204 6b and 7b; figure supplement 6). Together, these results suggest that LTM formation is also  
205 modulated by cAMP in early  $\alpha/\beta$  neurons.

206

### 207 **CREBB in early $\alpha/\beta$ neurons enhances LTM**



208 Protein synthesis-dependent LTM formation also depends on CREBB transcription factors, and  
209 expression of CREBB protein is thought to be dependent on the expression level of protein kinases  
210 involved in cAMP signaling ([Lee et al., 2018](#)). Consistent with our Rutabaga and PKA knockdown  
211 results, we induced RNAi knockdown of CREBB in early  $\alpha/\beta$  neurons and observed impairment  
212 of 1-day memory after 10xS training. Further impairment was not seen in combination with  
213 systemic protein synthesis inhibition by feeding CXM ([Figure 8C](#)). Because inhibition of protein  
214 synthesis in early  $\alpha/\beta$  neurons instead produced an enhancing effect on LTM formation, we  
215 inducibly expressed *crebB* repressor-transgenes ([Zhang et al., 2019](#)) in these neurons only, with the  
216 expectation that the manipulations would lead to enhanced memory. Indeed, expressing *crebB*  
217 enhanced 1-day memory after 1x training to levels normally seen after 10xS training ([Figure 8A-](#)  
218 [B; figure supplement 6](#)).

219

### 220 **Spaced training induces *crebB* transcription**

221 We next generated a *crebB* promoter-driven *Gal4* transgene containing an 11-kb 5' genomic  
222 sequence just upstream of CREBB (see Methods) ([Yin et al., 1995b](#)). This *crebB-Gal4* drives GFP  
223 expression in most glia cells and brain neurons, including most MB neurons, though higher levels  
224 of expression can be seen in  $\alpha/\beta$  compared to  $\alpha'/\beta'$  or  $\gamma$  neurons ([Figure 9A](#)). By photo converting  
225 pre-existing green KAEDE to red prior to training ([Chen et al., 2012](#)), we measured significantly  
226 more newly synthesized *crebB-Gal4* green KAEDE in the MB  $\alpha$ -lobe during 24-h intervals after  
227 5xS or 10xS training, but not after 1x training or 10xM training in comparison with naïve control  
228 flies ([Figure 9B-C](#)). This training-induced increase in *crebB* KAEDE appeared specific to the MB  
229 neurons because spaced training did not significantly change the levels of new *crebB* KAEDE in  
230 ellipsoid body (EB) or glia ([Figure 9B, right](#)). These results demonstrate that multiple sessions of  
231 spaced training increases CREBB expression in early  $\alpha/\beta$  neurons. Our finding that inhibition of

232 protein synthesis in early  $\alpha/\beta$  neurons enhanced LTM formation (Figure 1-3) suggests that *crebB*  
233 gene products function to repress protein synthesis.

234

### 235 **Schnurri (Shn) regulates CREBB-dependent LTM formation**

236 How does spaced training induce CREBB expression? To address this question, we sought to  
237 identify positive regulators of *crebB* transcription during LTM formation. Yeast two-hybrid and  
238 chromatin immunoprecipitation experiments previously revealed several such candidates that bind  
239 in the *crebB* promoter region (data not shown). Prominent among these were (1) CREB family  
240 protein CREBA, a leucine-zipper transcription factor (Smolik et al., 1992) and (2) Shn, a zinc finger  
241 C2H2 transcription factor encoded by the *shn* gene (Marty et al., 2000) which also was identified  
242 in a transposon mutagenesis screen for impairment of 1-day memory after 10xS as the *umnitza*  
243 mutant (Dubnau et al., 2003) (described above, see figure supplement 1).

244 Together, these findings implicated CREBA and Shn as candidate regulators of LTM formation  
245 through transcriptional activation of *crebB*. Interestingly, we inducibly overexpressed each in early  
246  $\alpha/\beta$  neurons and found enhanced 1-day memory after 1x or 3xS training with this manipulation of  
247 the *shn*<sup>+</sup> transgene but not *crebA*<sup>+</sup> (Figure 10A; figure supplement 7A-B). We also observed  
248 strongly elevated CREBB protein expression in transgenic *shn*<sup>+</sup> flies, but not in transgenic *rut*<sup>+</sup> or  
249 *Pka*<sup>act1</sup> flies (figure supplement 8). Moreover, inducible RNAi knockdowns of *shn* but not *crebA*  
250 impaired 1-day memory after 10xS (Figure 10B; figure supplement 7C), and further impairment  
251 was not seen with systemic protein synthesis inhibition after CXM feeding (Figure 10B, right).  
252 Memory after 10xS was fully rescued in *shn* knockdown flies by *crebB* co-expression (Figure 10C)  
253 and was enhanced relative to controls after 1x (Figure 10D). Taken together, these results show that  
254 CREBB expression in early  $\alpha/\beta$  neurons in response to spaced training is Shn-dependent.

255

### 256 **Discussion**

257 Our data suggest that MB neurons provide a compelling cellular gating mechanism for LTM  
258 formation. A single training session is sufficient to increase early  $\alpha/\beta$  neuronal excitability, the  
259 output from which produces a downstream inhibitory effect on LTM formation. After spaced  
260 training, cAMP signaling regulates neural excitability and/or Shn increases CREBB expression, the  
261 net effects of which we suggest then represses further protein synthesis, thereby reducing early  $\alpha/\beta$   
262 output and relieving the inhibitory effect on LTM formation. Remarkably, our observations  
263 emerged from a screen of enhancer trap memory mutants using Ricin<sup>CS</sup> protein synthesis inhibition  
264 (figure supplement 1). 1-day memory after 10xS was impaired in nine lines, eight of which showed  
265 expression in both MB & DAL neurons. Curiously, another seven lines were not impaired in 1-day  
266 memory after 10xS training – but they, too, showed enhancer expression patterns in MB & DAL  
267 neurons. We hypothesized that blocking protein synthesis in DAL neurons impaired LTM but doing  
268 so in (some) MB neurons might actually enhance LTM, negating the inhibitory effects in DAL  
269 neurons.

270 We tested this idea by maintaining Ricin<sup>CS</sup> expression in MB while blocking Ricin<sup>CS</sup> expression  
271 outside of MB using *cry-Gal80* (Figure 1). Surprisingly, LTM now was enhanced in all seven of  
272 these enhancer trap lines (Figure 1). We then identified early  $\alpha/\beta$  as the subset of MB neurons  
273 responsible for this enhancing effect (Figure 2). Inhibition protein synthesis in early  $\alpha/\beta$  neurons  
274 during the first 6 h, or blocking synaptic transmission from early  $\alpha/\beta$  neurons during the first 8 h  
275 after training was sufficient to enhance LTM (Figure 3 and 4). Increasing excitability of early  $\alpha/\beta$   
276 neurons impaired LTM, but decreasing excitability again enhanced LTM (Figure 5). We next asked  
277 whether these neural excitability-dependent effects were also cAMP dependent. RNAi mediated  
278 knockdown of Rutabaga or PKA in early  $\alpha/\beta$  impaired LTM, while overexpression of a *rut*<sup>+</sup> or  
279 *Pka<sup>act1</sup>* transgene enhanced LTM (Figure 6 and 7). CREBB expression is suggest to be  
280 synergistically and post-transcriptionally regulated by protein kinases responding to cAMP  
281 signaling (15) and accordingly, our RNAi mediated knockdown of CREBB in early  $\alpha/\beta$  impaired

282 LTM, while overexpression of a *crebB* transgene enhanced LTM (Figure 8). Finally, using a *crebB*  
283 promoter driven *Gal4* transgene, we show that CREBB transcription increases after 5xS or 10xS  
284 spaced training but not after 1x training (Figure 9). Thus, spaced training-dependent expression of  
285 CREBB repressor proteins in early  $\alpha/\beta$  neurons blocks this inhibitory output from early  
286  $\alpha/\beta$  neurons, thereby allowing LTM formation (downstream) to proceed.

287 An enhancing role associated with Shn-induced expression of CREBB repressor is a novel aspect  
288 of this LTM gating mechanism (Figure 10 and figure supplement 8). Previous reports have claimed  
289 that chronic expression of a CREBB repressor or RNAi transgenes in all  $\alpha/\beta$  neurons impaired 1-  
290 day memory after spaced training (Yu et al., 2006; Lee et al., 2018). Chen et al., (2012) documented,  
291 however, that these chronic disruptions of CREBB produced developmental abnormalities in MB  
292 structure. In contrast, acute induced expression of active Ricin<sup>CS</sup> or CREBB repressor only in adult  
293  $\alpha/\beta$  neurons did not impair 1-day memory after spaced training (and did not produce structural  
294 defects). Using a different inducible system (MB247-Switch) to acutely expresses CREBB in  $\gamma$  and  
295  $\alpha/\beta$  neurons, Hirano et al., (2016) showed a mild impairment of 1-day memory after spaced training.  
296 More interestingly, they used various molecular genetic tools to show that interactions among  
297 CREBB, CREB Binding Protein (CBP) and CREB Regulated Transcription Coactivator (CRTC)  
298 in MB clearly were involved in LTM formation or maintenance, respectively. Using the same  
299 inducible gene switch tool, Miyashita et al., (2018) showed a fascinating positive regulatory loop  
300 between Fos and CREBB in MB during LTM formation – but they did not show behavioral data  
301 pertaining to manipulation of CREBB *per se*- and they did not restrict their experiments to early  
302  $\alpha/\beta$  neurons.

303 A recent study that features *cyclic AMP-response element (CRE)*-driven transgenes is pertinent  
304 to this report. Zhang et al., (2015) expressed a *CRE-luciferase* transgene in different subpopulations  
305 of MB neurons and then monitored luciferase activity in live flies at various times after spaced  
306 training. Immediately after spaced training, they showed in some cases luciferase expression

307 decreased (*OK107* expressing in all MB neurons; *c739* expressing in all  $\alpha/\beta$  neurons; *1471*  
308 expressing in  $\gamma$  neurons), in others expression increased (*c747* and *c772* expressing variably in all  
309 MB neurons) or in some no changes were detected (*c320* expressing variably in  $\gamma$   $\alpha'/\beta'$  and  $\alpha/\beta$   
310 subpopulation, *17d* expressing primarily in late  $\alpha/\beta$  and in early  $\alpha/\beta$  neurons). Indeed, these authors  
311 point out that, because *CRE-luciferase* was expressed in more than one subpopulation of MB  
312 neurons, only net effects of CREB function could be quantified. Obviously, such a conclusion must  
313 be drawn from any behavioral data collected after CREBB manipulations in multiple  
314 subpopulations of MB neurons. Our study provides a dramatic example of this point. By restricting  
315 our manipulation only to the early  $\alpha/\beta$  neurons and only in adult stage animals, we show that acute  
316 overexpression or knockdown of CREBB enhances or impairs LTM formation, respectively (Figure  
317 8) and that spaced training serves to increase the expression of CREBB in these neurons (Figure 9).

318 Of particular relevance to our future studies is the curious discovery that output from early  $\alpha/\beta$   
319 neurons specifically *inhibits* LTM formation. We find no evidence of inhibitory transmitter (*i.e.*,  
320 GABA) synthesis or signaling in early  $\alpha/\beta$  neurons, however, and others have suggested that  
321 memory-relevant MB output synapses are cholinergic (*Barnstedt et al., 2016*). Thus, we presume  
322 that inhibition of LTM lies somewhere downstream in the memory circuit. Furthermore, we note  
323 that ARM appears to involve  $\alpha/\beta$  neurons (*Lee et al., 2011; Knappek et al., 2011; Scholz-Kornehl and*  
324 *Schwärzel, 2016; Kotoula et al., 2017; Shyu et al., 2019*) and to inhibit LTM formation (*Isabel et*  
325 *al., 2004; Placais et al., 2012*). Thus, a molecular link between ARM and LTM may reside in early  
326  $\alpha/\beta$  neurons.

327 More generally, our results underscore the need to study behavior-genetic relations in each of the  
328 seven MB neuronal subpopulations (*Aso et al., 2014*) separately before drawing firm conclusions  
329 about a role for MB in specific memory phases or in the dynamics of a larger memory circuit  
330 involving neurons intrinsic and extrinsic to MB. With the more complex circuitries in vertebrate

331 animal models, such deconstruction of memory formation into specific neuronal subtypes will be  
332 even more critical and enlightening.

333

## 334 **Materials and Methods**

335 A collection of *Drosophila P-Gal4* transposon insertions were previously selected in an enhancer  
336 trap mutagenesis screen for long-term memory phenotypes (*Dubnau et al., 2003*). The resultant  
337 Gal4 expression patterns in seven of these mutants were leveraged to drive and temporally control  
338 cold-sensitive Ricin<sup>CS</sup> activity to block protein synthesis in the identified neuron subsets. In addition,  
339 we spatially restricted Ricin<sup>CS</sup> activity by inhibiting Gal4 with MB or DAL neuron-specific  
340 expression of Gal80. We used an automated olfactory aversive learning task (*Tully et al., 1994*) and  
341 assessed LTM after blocking protein synthesis, inhibiting consolidation in these temporally and  
342 spatially restricted domains to identify the subsets of neurons critical for this task. Blocking  
343 transmission from these neurons with Gal4-targetted temperature-sensitive Dynamin<sup>ts</sup> after training  
344 was used to test the implicated roles of these neurons in LTM consolidation (*Dubnau et al., 2001*;  
345 *McGuire et al., 2001*). Spatial and temporal regulation of K<sup>+</sup> and Na<sup>+</sup> channel activity with  
346 transgene overexpression and RNAi knockdown within these neurons was used to assess the  
347 downstream impacts of signaling valence on LTM. Similarly, restricted expression of transgenes  
348 was used to examine the training-responsive effects on LTM. We evaluated training-responsive  
349 CREBB expression with confocal microscopy using a *Gal4*-targeted UV-sensitive KAEDE reporter  
350 system (*Chen et al., 2012*). In various experiments, flies were fed CXM to provide a systemic level  
351 of protein synthesis inhibition. Detailed procedures for all methods are described in the  
352 supplementary materials.

353

## 354 **Flies**

355 Fly stocks were maintained on standard corn meal/yeast/agar medium at  $25 \pm 1$  °C or  $18 \pm 1$  °C and  
356 70% relative humidity on a 12:12-h light:dark cycle. All genotypes and sources are listed in [table](#)  
357 [supplement 2](#).

358

## 359 **Behaviour**

360 Olfactory associative learning was evaluated by training 6- to 7-day-old flies in a T-maze apparatus  
361 with a Pavlovian olfactory conditioning procedure (*Tully and Quinn, 1985*) as described previously  
362 (*Chen et al., 2012; Pai et al., 2013; Wu et al., 2017*). All experiments were conducted in the dark  
363 in an environment-controlled room at the required temperatures and 70% relative humidity. The  
364 odours used were 3-octanol (OCT) and 4-methylcyclohexanol (MCH). Each experiment consisted  
365 of two groups of approximately 100 flies, each of which was conditioned with one of the two odours.  
366 Flies were exposed sequentially to two odours that were carried through the training chamber in a  
367 current of air (odours were bubbled at 750 ml/min). In a single training session, flies first were  
368 exposed for 60 s to the conditioned stimulus (CS<sup>+</sup>), during which time they received the  
369 unconditioned stimulus (US), which consisted of 12 1.5-s pulses of 60 V dc electric shock presented  
370 at 5-s interpulse intervals. After the presentation of the CS<sup>+</sup> condition, the chamber was flushed  
371 with fresh air for 45 s. Then flies were exposed for 60 s to the unpaired CS<sup>-</sup>. To evaluate memory  
372 retention immediately after single-session training (acquisition), flies were gently tapped into an  
373 elevator-like compartment immediately after training. After 90 s, the flies were transported to the  
374 choice point of a T-maze, in which they were exposed to two converging currents of air (one  
375 carrying OCT, the other MCH) from opposite arms of the maze. Flies were free to choose between  
376 and walk toward the CS<sup>+</sup> and CS<sup>-</sup> for 120 s, at which time they were trapped inside the respective  
377 arms of the T-maze (by sliding the elevator out of the register), anaesthetised, and counted. Flies that  
378 chose to avoid the CS<sup>+</sup> ran into the T-maze arm containing the CS<sup>-</sup>, whereas flies that chose to avoid  
379 the CS<sup>-</sup> ran into the arm containing the CS<sup>+</sup>. For each experiment, a performance index (PI<sub>1,2</sub>) =

380  $(N_{Cs-} - N_{Cs+}) / (N_{Cs-} + N_{Cs+})$  was calculated and averaged over these two complementary  
381 experiments, with the final PI =  $(PI_1 + PI_2) / 2$ . Averaging of the two reciprocal scores eliminated  
382 any potential biases originating from the machine, naïve odour preferences, or non-associative  
383 changes in olfaction. For 24-h memory experiments, flies were subjected to single-session training,  
384 training massed together without rest, or training spaced out with 15-min rest intervals. For these  
385 training protocols, robotic trainers were used. All genotypes were trained and tested in parallel and  
386 rotated among all of the robotic trainers to ensure a balanced experiment. The genetic backgrounds  
387 of all fly strains were equilibrated to the “Canton” wild-type background by five or more  
388 generations of backcrossing. In *tub-Gal80<sup>ts</sup>* experiments, flies raised at 18 °C were transferred to  
389 30 °C for at least five days before the experiments.

390

### 391 **Pharmacological treatment**

392 To block protein synthesis, flies were fed 35 mM cycloheximide (Sigma) in 5% glucose 1 day  
393 before training until immediately before the test (*Tully et al., 1994*).

394

### 395 ***crebB* promoter construct**

396 To engineer the *crebB* promoter construct, polymerase chain reaction (PCR) was performed using  
397 genomic DNA from the wild-type *Canton-S w<sup>1118</sup> (iso1CJ)* fly line as the template together with  
398 the forward primer 5'GAAAAGTGCCACCTGCTGCATGTCTACCAACAGTTCGAG 3' and the  
399 reverse primer 5'CCGGATCTGCTAGCGGTTCCAGCTGCTGTCTGTATGAC 3'. A 11.6-kb  
400 PCR product was generated and inserted into the pBPGAL4.2Uw-2 vector, was digested with AatII  
401 and KpnI using In-Fusion<sup>®</sup> cloning system (Clontech). The promoter construct was injected into  
402 *attP<sup>40</sup>*-containing fly strains to obtain the transgenic fly lines.

403

### 404 **KAEDE measurement**



405 KAEDE is a photoconvertible green fluorescent protein, irreversibly changing its structure to a red  
406 fluorescent protein upon ultraviolet irradiation (*Ando et al., 2002*). Taking advantage of circadian  
407 transcription and protein synthesis in the lateral clock neurons, we previously validated *de novo*  
408 KAEDE synthesis in *per-Gal4>UAS-kaede* flies, in which it faithfully reports the cyclic  
409 transcriptions of the *period* gene. Feeding cycloheximide also suppressed green KAEDE synthesis,  
410 while not affecting the already-converted red KAEDE (*Chen et al., 2012*). To measure the amount  
411 of newly synthesised KAEDE in MB neurons, we used procedures adapted from a previous study  
412 (*Chen et al., 2012*). Briefly, pre-existing KAEDE proteins were photoconverted into red fluorescent  
413 proteins by 365–395 nm UV irradiation generated from a 120-W mercury lamp. For behavioural  
414 testing, approximately 15–20 flies kept in a clear plastic syringe were directly exposed to UV light  
415 at a distance of 5 cm for 1 h. Individual neurons expressing KAEDE were directly visualised  
416 through an open window in the fly’s head capsule. Living samples were used because the signal-  
417 to-noise ratio of green to red KAEDE is greatly reduced after chemical fixation. KAEDE neurons  
418 were located in less than 5 s by a fast pre-scanning of red KAEDE excited by a 561-nm laser, to  
419 avoid unnecessary fluorescence quenching of green KAEDE during repeated scanning. A single  
420 optical slice through the MB  $\alpha$ -lobe tip was imaged at a resolution of 1024×1024 pixels under a  
421 confocal microscope with a 40× C-Apochromat water-immersion objective lens (N.A. value 1.2,  
422 working distance 220  $\mu$ m). All brain samples in the experiment were imaged with the same optical  
423 settings maximised for green and red KAEDE immediately before and after photoconversion,  
424 respectively. In all cases, both green KAEDE (excited by a 488-nm laser) and red KAEDE (excited  
425 by a 561-nm laser) were measured. By using the amount of red KAEDE as an internal standard to  
426 calibrate individual variation, we calculated the rate of increase in green KAEDE synthesis after  
427 photoconversion with the formula  $(\Delta F) = \%(F_{t_1} - \text{average } F_{t_0})/\text{average } F_{t_0}$ , where  $F_{t_1}$  and  $F_{t_0}$  are  
428 the ratios of the averaged intensities of green (G) to red (R) KAEDE ( $G_{t_0}/R_{t_0}$ ) immediately after  
429 photoconversion ( $t_0$ ) and at a later specific time point ( $t_1$ ), respectively.

430

### 431 **Spatiotemporal inhibition of protein synthesis**

432 Ricin<sup>CS</sup>, a mutated Ricin A chain, inactivates eukaryotic ribosomes by hydrolytically cleaving the  
433 N-glycosidic bond (A4324) of the 28S ribosomal RNA subunit at high temperatures (30°C), but  
434 not at low temperatures (18°C) (*Endo et al., 1987; Endo and Tsurugi, 1987; Moffat et al., 1992;*  
435 *Allen et al., 2002*). We previously validated the spatiotemporal effect of Ricin<sup>CS</sup> inhibition in the  
436 *Drosophila* brain using lateral clock neurons. We found that Ricin<sup>CS</sup> can effectively inhibit ~80%  
437 of protein synthesis at a permissive temperature (30°C), which is quickly reversed to normal levels  
438 after shifting to a restrictive temperature (18°C) (*Chen et al., 2012*). This suggests a quick  
439 restoration of ribosomal synthesis once Ricin<sup>CS</sup> becomes inactive. While active Ricin<sup>CS</sup> is a potent  
440 cytotoxin for inhibiting protein synthesis, it tends not to be lethal, as Ricin<sup>CS</sup> eventually inhibits its  
441 own synthesis (*Chen et al., 2012, Moffat et al., 1992; Allen et al., 2002*). In the current experiments,  
442 two copies of Ricin<sup>CS</sup> was used to block protein synthesis. All flies were raised at 18°C to keep  
443 Ricin<sup>CS</sup> inactive. Before or after training at 18°C, the *Gal4 > UAS-ricin<sup>CS</sup>; UAS-ricin<sup>CS</sup>* flies were  
444 transferred to 30°C for 24 h to activate Ricin<sup>CS</sup>, and then shifted back to 18°C for 1 h to inactivate  
445 Ricin<sup>CS</sup> before the experiments. Temporal control of Ricin<sup>CS</sup> activation is indicated in the figures  
446 for the relevant experiments.

447

### 448 **Immunohistochemistry**

449 Brains were dissected in phosphate-buffered saline (PBS), fixed with a commercial microwave  
450 oven (2,450 MHz, 1100 Watts) in 4% paraformaldehyde on ice for 60 s three times, and then  
451 immersed in 4% paraformaldehyde with 0.25% Triton X-100 for 60 s three times. After being  
452 washed in PBS for 10 min at room temperature, brain samples were incubated in PBS containing  
453 2% Triton X-100 (PBS-T) and 10% normal goat serum, and then degassed in a vacuum chamber to  
454 expel tracheal air for four cycles (depressurizing to -70 mmHg and then holding for 10 min). Next,

455 brain samples were blocked and penetrated in PBS-T at 4 °C overnight, and then incubated in PBS-  
456 T containing (1) 1:40 mouse 4F3 anti-DLG antibody (Developmental Studies Hybridoma Bank,  
457 University of Iowa) to label Disc large proteins, and (2) 1:500 mouse anti-CREBB  $\alpha$ 657 antibody  
458 (from Jerry Yin (*Tubon et al., 2013*)) at 4 °C for 1 day. Samples were subsequently washed in PBS-  
459 T three times and incubated in PBS-T containing 1:200 biotinylated goat anti-mouse IgG  
460 (Molecular Probes) as the secondary antibody at 25 °C for 1 day. Brain samples were then washed  
461 and incubated with 1:500 Alexa Fluor 635 streptavidin (Molecular Probes) at 25 °C for 1 day.  
462 Finally, after extensive washing, immunolabeled brain samples were directly cleared for 5 min in  
463 *FocusClear*, an aqueous solution that renders biological tissue transparent (*Chiang et al., 2001*),  
464 and mounted between two cover slips separated by a spacer ring with a thickness of ~200  $\mu$ m.  
465 Sample brains were imaged under a Zeiss LSM 780 or 880 confocal microscope with a 40 $\times$  C-  
466 Apochromat water-immersion objective lens (N.A. value 1.2, working distance 220  $\mu$ m).

467

## 468 **Statistics**

469 All raw data were analysed parametrically with SigmaPlot 10.0 and SigmaStat 3.5 statistical  
470 software. All the data including the behaviour Performance Index (PI) or KAEDE image ( $\Delta F$ ) were  
471 evaluated via unpaired *t*-test (two groups) or one-way analysis of variance (ANOVA) (> two  
472 groups). Data were evaluated with the Mann-Whitney Rank Sum Test in cases of unequal variances.  
473 Data in all figures are presented as the mean  $\pm$  SE. Experiments were replicated using multiple *Gal4*  
474 drivers with equivalent expression patterns, and multiple effector genes and reagents that impact  
475 shared cellular functions.

476

## 477 **Acknowledgments**

478 We thank the Bloomington *Drosophila* stock center, *Vienna Drosophila RNAi Center*  
479 (*VDRC*) and Kyoto *Drosophila* Genomics Resource Centers (*DGRC*) for fly stocks. We  
480 also thank the Developmental Studies Hybridoma Bank for the antibodies.

481 **Funding:** This work was financially supported by

- 482 • The Brain Research Center under the Higher Education Sprout Project co-funded by  
483 the Ministry of Education and the Ministry of Science and Technology in Taiwan
- 484 • Yushan Scholar Program from the Ministry of Education in Taiwan
- 485 • Dart NeuroScience LLC in U.S.A.

486 **Author contributions:**

487 Conceived the project, analysed the data, and wrote the manuscript: C.C.C., J.S.D.,  
488 T.T. and A.S.C.

489 Imaging experiments: H.W.L.

490 Behavioural experiments: C.C.C. and F.K.L.

491 Generated *creb2-Gal4* transgenic flies: R.Y.J. and L.C.

492  
493 **Competing interests:** All other authors declare they have no competing interests.

494  
495 **Data and materials availability:** All data are available in the main text or the supplementary  
496 materials.

## 497 498 **References**

499 Allen, M.J., O'Kane, C.J., and Moffat, K.G. (2002). Cell ablation using wild-type and cold-  
500 sensitive ricin-A chain in *Drosophila* embryonic mesoderm. *Genesis* 34, 132-134.

501 Ando, R., Hama, H., Yamamoto-Hino, M., Mizuno, H., and Miyawaki, A. (2002). An optical  
502 marker based on the UV-induced green-to-red photoconversion of a fluorescent protein. *Proc Natl*  
503 *Acad Sci U S A* 99, 12651-12656.

504 Aso, Y., Hattori, D., Yu, Y., Johnston, R.M., Iyer, N.A., Ngo, T.T., Dionne, H., Abbott, L.F.,  
505 Axel, R., Tanimoto, H., et al. (2014). The neuronal architecture of the mushroom body provides a  
506 logic for associative learning. *Elife* 3, e04577.

507 Baines, R.A. (2003). Postsynaptic protein kinase A reduces neuronal excitability in response to  
508 increased synaptic excitation in the *Drosophila* CNS. *J Neurosci* 23, 8664-8672.

509 Barnstedt, O., Oswald, D., Felsenberg, J., Brain, R., Moszynski, J.P., Talbot, C.B., Perrat, P.N.,  
510 and Waddell, S. (2016). Memory-Relevant Mushroom Body Output Synapses Are Cholinergic.  
511 *Neuron* 89, 1237-1247.

512 Blum, A.L., Li, W., Cressy, M., and Dubnau, J. (2009). Short- and long-term memory in  
513 *Drosophila* require cAMP signaling in distinct neuron types. *Curr Biol* 19, 1341-1350.

514 Bouzaiane, E., Trannoy, S., Scheunemann, L., Placais, P.Y., and Preat, T. (2015). Two  
515 independent mushroom body output circuits retrieve the six discrete components of *Drosophila*  
516 aversive memory. *Cell Rep* 11, 1280-1292.

517 Chen, C.C., Wu, J.K., Lin, H.W., Pai, T.P., Fu, T.F., Wu, C.L., Tully, T., and Chiang, A.S.  
518 (2012). Visualizing long-term memory formation in two neurons of the *Drosophila* brain. *Science*  
519 335, 678-685.

520 Chiang, A.S., Liu, Y.C., Chiu, S.L., Hu, S.H., Huang, C.Y., and Hsieh, C.H. (2001). Three-  
521 dimensional mapping of brain neuropils in the cockroach, *Diploptera punctata*. *J Comp Neurol*  
522 440, 1-11.

523 Cognigni, P., Felsenberg, J., and Waddell, S. (2018). Do the right thing: neural network  
524 mechanisms of memory formation, expression and update in *Drosophila*. *Curr Opin Neurobiol*  
525 49, 51-58.

526 Davis, G.W., DiAntonio, A., Petersen, S.A., and Goodman, C.S. (1998). Postsynaptic PKA  
527 controls quantal size and reveals a retrograde signal that regulates presynaptic transmitter release  
528 in *Drosophila*. *Neuron* 20, 305-315.

529 Davis, R.L. (2015). SnapShot: Olfactory Classical Conditioning of *Drosophila*. *Cell* 163, 524-524  
530 e521.

531 Dubnau, J., and Chiang, A.S. (2013). Systems memory consolidation in *Drosophila*. *Curr Opin*  
532 *Neurobiol* 23, 84-91.

533 Dubnau, J., Chiang, A.S., Grady, L., Barditch, J., Gossweiler, S., McNeil, J., Smith, P., Buldoc,  
534 F., Scott, R., Certa, U., et al. (2003). The staufer/pumilio pathway is involved in *Drosophila* long-  
535 term memory. *Curr Biol* 13, 286-296.

536 Dubnau, J., Grady, L., Kitamoto, T., and Tully, T. (2001). Disruption of neurotransmission in  
537 *Drosophila* mushroom body blocks retrieval but not acquisition of memory. *Nature* 411, 476-480.

538 Dudai, Y., Jan, Y.N., Byers, D., Quinn, W.G., and Benzer, S. (1976). *dunce*, a mutant of  
539 *Drosophila* deficient in learning. *Proc Natl Acad Sci U S A* 73, 1684-1688.

540 Endo, Y., Mitsui, K., Motizuki, M., and Tsurugi, K. (1987). The mechanism of action of ricin and  
541 related toxic lectins on eukaryotic ribosomes. The site and the characteristics of the modification  
542 in 28 S ribosomal RNA caused by the toxins. *J Biol Chem* 262, 5908-5912.

543 Endo, Y., and Tsurugi, K. (1987). RNA N-glycosidase activity of ricin A-chain. Mechanism of  
544 action of the toxic lectin ricin on eukaryotic ribosomes. *J Biol Chem* 262, 8128-8130.

545 Fropf, R., Zhang, J., Tanenhaus, A.K., Fropf, W.J., Siefkes, E., and Yin, J.C. (2014). Time of day  
546 influences memory formation and dCREB2 proteins in *Drosophila*. *Front Syst Neurosci* 8, 43.

547 Ge, X., Hannan, F., Xie, Z., Feng, C., Tully, T., Zhou, H., Xie, Z., and Zhong, Y. (2004). Notch  
548 signaling in *Drosophila* long-term memory formation. *Proc Natl Acad Sci U S A* 101, 10172-  
549 10176.

550 Hirano, Y., Ihara, K., Masuda, T., Yamamoto, T., Iwata, I., Takahashi, A., Awata, H., Nakamura,  
551 N., Takakura, M., Suzuki, Y., et al. (2016). Shifting transcriptional machinery is required for  
552 long-term memory maintenance and modification in *Drosophila* mushroom bodies. *Nat Commun*  
553 7, 13471.

554 Hodge, J.J., Choi, J.C., O'Kane, C.J., and Griffith, L.C. (2005). Shaw potassium channel genes in  
555 *Drosophila*. *J Neurobiol* 63, 235-254.

556 Huang, C., Zheng, X., Zhao, H., Li, M., Wang, P., Xie, Z., Wang, L., and Zhong, Y. (2012). A  
557 permissive role of mushroom body alpha/beta core neurons in long-term memory consolidation in  
558 *Drosophila*. *Curr Biol* 22, 1981-1989.

559 Isabel, G., Pascual, A., and Preat, T. (2004). Exclusive consolidated memory phases in  
560 *Drosophila*. *Science* 304, 1024-1027.

561 Ito, K., Awano, W., Suzuki, K., Hiromi, Y., and Yamamoto, D. (1997). The *Drosophila*  
562 mushroom body is a quadruple structure of clonal units each of which contains a virtually  
563 identical set of neurones and glial cells. *Development* 124, 761-771.

564 Joiner, W.J., Crocker, A., White, B.H., and Sehgal, A. (2006). Sleep in *Drosophila* is regulated by  
565 adult mushroom bodies. *Nature* 441, 757-760.

566 Knapek, S., Sigrist, S., and Tanimoto, H. (2011). Bruchpilot, a synaptic active zone protein for  
567 anesthesia-resistant memory. *J Neurosci* 31, 3453-3458.

568 Kotoula, V., Moressis, A., Semelidou, O., and Skoulakis, E.M.C. (2017). Drk-mediated signaling  
569 to Rho kinase is required for anesthesia-resistant memory in *Drosophila*. *Proc Natl Acad Sci U S*  
570 *A* 114, 10984-10989.

571 Krashes, M.J., Keene, A.C., Leung, B., Armstrong, J.D., and Waddell, S. (2007). Sequential use  
572 of mushroom body neuron subsets during *Drosophila* odor memory processing. *Neuron* 53, 103-  
573 115.

- 574 Lee, P.T., Lin, G., Lin, W.W., Diao, F., White, B.H., and Bellen, H.J. (2018). A kinase-dependent  
575 feedforward loop affects CREBB stability and long term memory formation. *Elife* 7.
- 576 Lee, P.T., Lin, H.W., Chang, Y.H., Fu, T.F., Dubnau, J., Hirsh, J., Lee, T., and Chiang, A.S.  
577 (2011). Serotonin-mushroom body circuit modulating the formation of anesthesia-resistant  
578 memory in *Drosophila*. *Proc Natl Acad Sci U S A* 108, 13794-13799.
- 579 Lin, H.H., Lai, J.S., Chin, A.L., Chen, Y.C., and Chiang, A.S. (2007). A map of olfactory  
580 representation in the *Drosophila* mushroom body. *Cell* 128, 1205-1217.
- 581 Marty, T., Muller, B., Basler, K., and Affolter, M. (2000). Schnurri mediates Dpp-dependent  
582 repression of brinker transcription. *Nat Cell Biol* 2, 745-749.
- 583 McGuire, S.E., Le, P.T., and Davis, R.L. (2001). The role of *Drosophila* mushroom body  
584 signaling in olfactory memory. *Science* 293, 1330-1333.
- 585 McGuire, S.E., Le, P.T., Osborn, A.J., Matsumoto, K., and Davis, R.L. (2003). Spatiotemporal  
586 rescue of memory dysfunction in *Drosophila*. *Science* 302, 1765-1768.
- 587 Miyashita, T., Kikuchi, E., Horiuchi, J., and Saitoe, M. (2018). Long-Term Memory Engram  
588 Cells Are Established by c-Fos/CREB Transcriptional Cycling. *Cell Rep* 25, 2716-2728 e2713.
- 589 Moffat, K.G., Gould, J.H., Smith, H.K., and O'Kane, C.J. (1992). Inducible cell ablation in  
590 *Drosophila* by cold-sensitive ricin A chain. *Development* 114, 681-687.
- 591 Pai, T.P., Chen, C.C., Lin, H.H., Chin, A.L., Lai, J.S., Lee, P.T., Tully, T., and Chiang, A.S.  
592 (2013). *Drosophila* ORB protein in two mushroom body output neurons is necessary for long-  
593 term memory formation. *Proc Natl Acad Sci U S A* 110, 7898-7903.
- 594 Pavlopoulos, E., Anezaki, M., and Skoulakis, E.M. (2008). Neuralized is expressed in the  
595 alpha/beta lobes of adult *Drosophila* mushroom bodies and facilitates olfactory long-term  
596 memory formation. *Proc Natl Acad Sci U S A* 105, 14674-14679.
- 597 Perisse, E., Burke, C., Huetteroth, W., and Waddell, S. (2013). Shocking revelations and  
598 saccharin sweetness in the study of *Drosophila* olfactory memory. *Curr Biol* 23, R752-763.



599 Placais, P.Y., Trannoy, S., Isabel, G., Aso, Y., Siwanowicz, I., Belliard-Guerin, G., Vernier, P.,  
600 Birman, S., Tanimoto, H., and Preat, T. (2012). Slow oscillations in two pairs of dopaminergic  
601 neurons gate long-term memory formation in *Drosophila*. *Nat Neurosci* 15, 592-599.

602 Presente, A., Boyles, R.S., Serway, C.N., de Belle, J.S., and Andres, A.J. (2004). Notch is  
603 required for long-term memory in *Drosophila*. *Proc Natl Acad Sci U S A* 101, 1764-1768.

604 Quinn, W.G., and Dudai, Y. (1976). Memory phases in *Drosophila*. *Nature* 262, 576-577.

605 Scheunemann, L., Jost, E., Richlitzki, A., Day, J.P., Sebastian, S., Thum, A.S., Efetova, M.,  
606 Davies, S.A., and Schwarzel, M. (2012). Consolidated and labile odor memory are separately  
607 encoded within the *Drosophila* brain. *J Neurosci* 32, 17163-17171.

608 Scheunemann, L., Placais, P.Y., Dromard, Y., Schwarzel, M., and Preat, T. (2018). Dunce  
609 Phosphodiesterase Acts as a Checkpoint for *Drosophila* Long-Term Memory in a Pair of  
610 Serotonergic Neurons. *Neuron* 98, 350-365 e355.

611 Scholz-Kornehl, S., and Schwarzel, M. (2016). Circuit Analysis of a *Drosophila* Dopamine Type  
612 2 Receptor That Supports Anesthesia-Resistant Memory. *J Neurosci* 36, 7936-7945.

613 Sejourne, J., Placais, P.Y., Aso, Y., Siwanowicz, I., Trannoy, S., Thoma, V., Tedjakumala, S.R.,  
614 Rubin, G.M., Tchenio, P., Ito, K., et al. (2011). Mushroom body efferent neurons responsible for  
615 aversive olfactory memory retrieval in *Drosophila*. *Nat Neurosci* 14, 903-910.

616 Shyu, W.H., Lee, W.P., Chiang, M.H., Chang, C.C., Fu, T.F., Chiang, H.C., Wu, T., and Wu,  
617 C.L. (2019). Electrical synapses between mushroom body neurons are critical for consolidated  
618 memory retrieval in *Drosophila*. *PLoS Genet* 15, e1008153.

619 Smolik, S.M., Rose, R.E., and Goodman, R.H. (1992). A cyclic AMP-responsive element-binding  
620 transcriptional activator in *Drosophila melanogaster*, dCREB-A, is a member of the leucine  
621 zipper family. *Mol Cell Biol* 12, 4123-4131.

622 Stoleru, D., Peng, Y., Agosto, J., and Rosbash, M. (2004). Coupled oscillators control morning  
623 and evening locomotor behaviour of *Drosophila*. *Nature* 431, 862-868.

- 624 Tanaka, N.K., Tanimoto, H., and Ito, K. (2008). Neuronal assemblies of the *Drosophila*  
625 mushroom body. *J Comp Neurol* 508, 711-755.
- 626 Tonoki, A., and Davis, R.L. (2015). Aging impairs protein-synthesis-dependent long-term  
627 memory in *Drosophila*. *J Neurosci* 35, 1173-1180.
- 628 Tubon, T.C., Jr., Zhang, J., Friedman, E.L., Jin, H., Gonzales, E.D., Zhou, H., Drier, D., Gerstner,  
629 J.R., Paulson, E.A., Fropf, R., et al. (2013). dCREB2-mediated enhancement of memory  
630 formation. *J Neurosci* 33, 7475-7487.
- 631 Tully, T. (1996). Discovery of genes involved with learning and memory: an experimental  
632 synthesis of Hirschian and Benzerian perspectives. *Proc Natl Acad Sci U S A* 93, 13460-13467.
- 633 Tully, T., Boynton, S., Brandes, C., Dura, J.M., Mihalek, R., Preat, T., and Vilella, A. (1990).  
634 Genetic dissection of memory formation in *Drosophila melanogaster*. *Cold Spring Harb Symp*  
635 *Quant Biol* 55, 203-211.
- 636 Tully, T., Preat, T., Boynton, S.C., and Del Vecchio, M. (1994). Genetic dissection of  
637 consolidated memory in *Drosophila*. *Cell* 79, 35-47.
- 638 Tully, T., and Quinn, W.G. (1985). Classical conditioning and retention in normal and mutant  
639 *Drosophila melanogaster*. *J Comp Physiol A* 157, 263-277.
- 640 Venken, K.J., Simpson, J.H., and Bellen, H.J. (2011). Genetic manipulation of genes and cells in  
641 the nervous system of the fruit fly. *Neuron* 72, 202-230.
- 642 Wu, C.L., Shih, M.F., Lee, P.T., and Chiang, A.S. (2013). An octopamine-mushroom body circuit  
643 modulates the formation of anesthesia-resistant memory in *Drosophila*. *Curr Biol* 23, 2346-2354.
- 644 Wu, C.L., Xia, S., Fu, T.F., Wang, H., Chen, Y.H., Leong, D., Chiang, A.S., and Tully, T. (2007).  
645 Specific requirement of NMDA receptors for long-term memory consolidation in *Drosophila*  
646 ellipsoid body. *Nat Neurosci* 10, 1578-1586.

647 Wu, J.K., Tai, C.Y., Feng, K.L., Chen, S.L., Chen, C.C., and Chiang, A.S. (2017). Long-term  
648 memory requires sequential protein synthesis in three subsets of mushroom body output neurons  
649 in *Drosophila*. *Sci Rep* 7, 7112.

650 Yang, C.H., Shih, M.F., Chang, C.C., Chiang, M.H., Shih, H.W., Tsai, Y.L., Chiang, A.S., Fu,  
651 T.F., and Wu, C.L. (2016). Additive Expression of Consolidated Memory through *Drosophila*  
652 Mushroom Body Subsets. *PLoS Genet* 12, e1006061.

653 Yin, J.C., Del Vecchio, M., Zhou, H., and Tully, T. (1995a). CREB as a memory modulator:  
654 induced expression of a dCREB2 activator isoform enhances long-term memory in *Drosophila*.  
655 *Cell* 81, 107-115.

656 Yin, J.C., Wallach, J.S., Del Vecchio, M., Wilder, E.L., Zhou, H., Quinn, W.G., and Tully, T.  
657 (1994). Induction of a dominant negative CREB transgene specifically blocks long-term memory  
658 in *Drosophila*. *Cell* 79, 49-58.

659 Yin, J.C., Wallach, J.S., Wilder, E.L., Klingensmith, J., Dang, D., Perrimon, N., Zhou, H., Tully,  
660 T., and Quinn, W.G. (1995b). A *Drosophila* CREB/CREM homolog encodes multiple isoforms,  
661 including a cyclic AMP-dependent protein kinase-responsive transcriptional activator and  
662 antagonist. *Mol Cell Biol* 15, 5123-5130.

663 Yu, D., Akalal, D.B., and Davis, R.L. (2006). *Drosophila* alpha/beta mushroom body neurons  
664 form a branch-specific, long-term cellular memory trace after spaced olfactory conditioning.  
665 *Neuron* 52, 845-855.

666 Zhang, J., Tanenhaus, A.K., Davis, J.C., Hanlon, B.M., and Yin, J.C. (2015). Spatio-temporal in  
667 vivo recording of dCREB2 dynamics in *Drosophila* long-term memory processing. *Neurobiol*  
668 *Learn Mem* 118, 80-88.

669 Zhang, S.X., Rogulja, D., and Crickmore, M.A. (2019). Recurrent Circuitry Sustains *Drosophila*  
670 Courtship Drive While Priming Itself for Satiety. *Curr Biol* 29, 3216-3228 e3219.

671 Zhu, S., Chiang, A.S., and Lee, T. (2003). Development of the *Drosophila* mushroom bodies:  
 672 elaboration, remodeling and spatial organization of dendrites in the calyx. *Development* 130,  
 673 2603-2610.

674  
 675  
 676  
 677  
 678  
 679  
 680  
 681  
 682

**Figures**

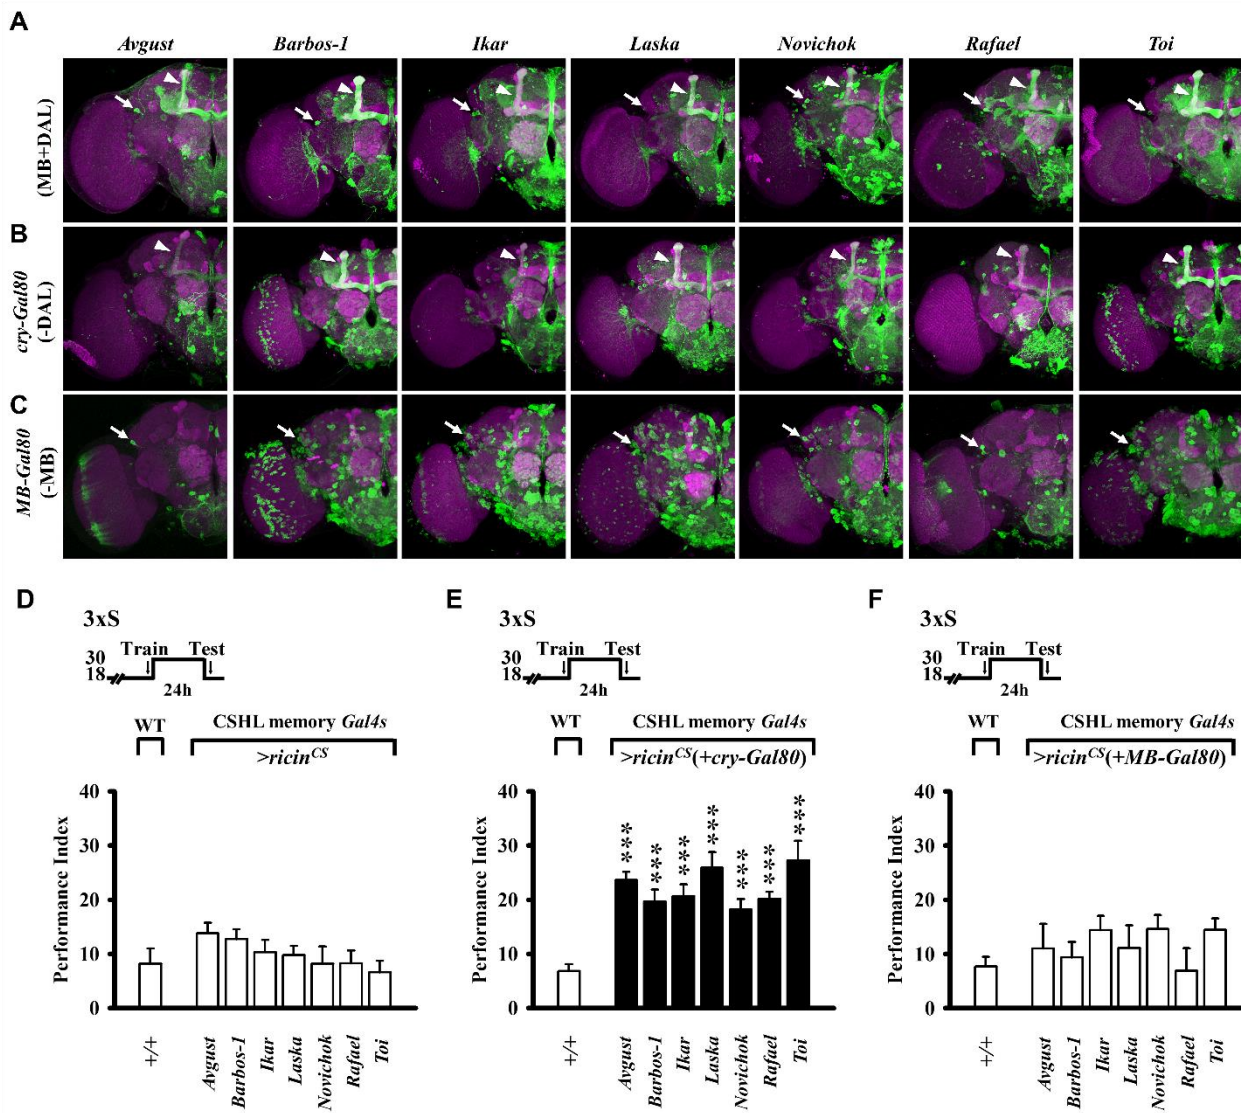

683  
 684

**Figure 1**

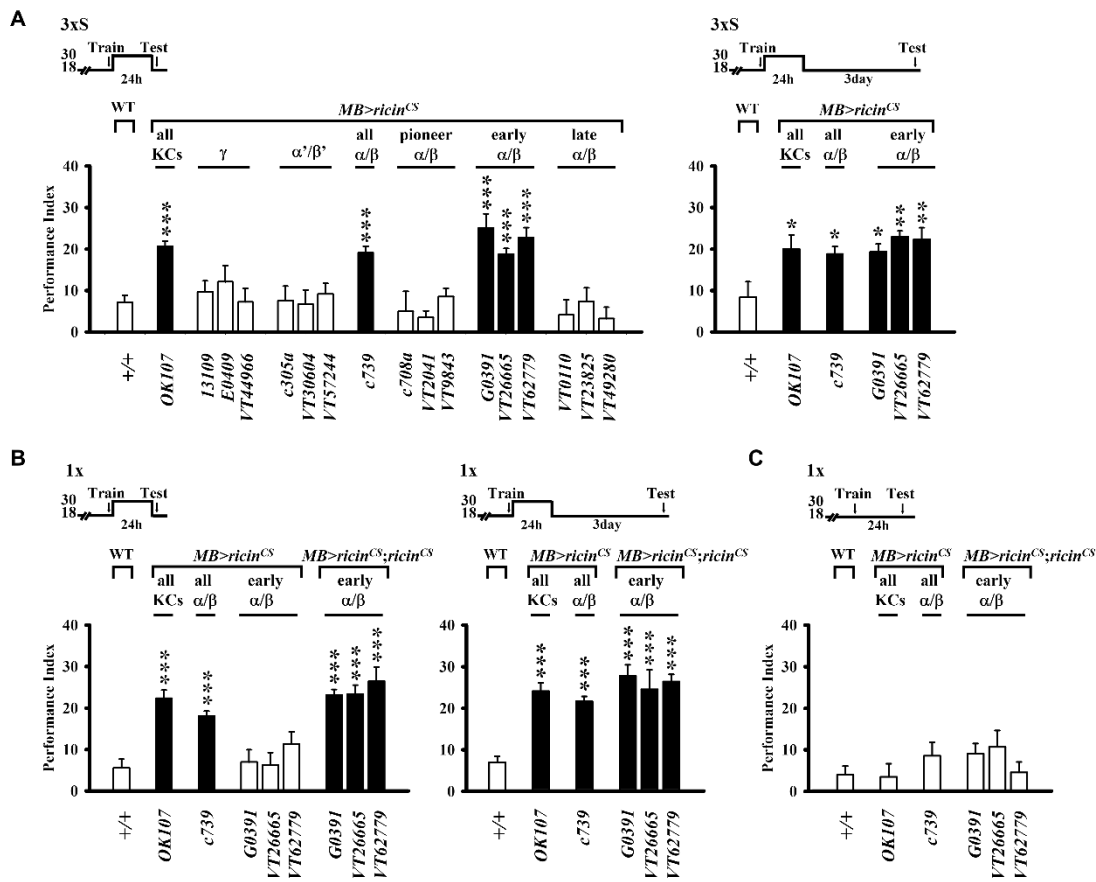

685

686 **Figure 2**

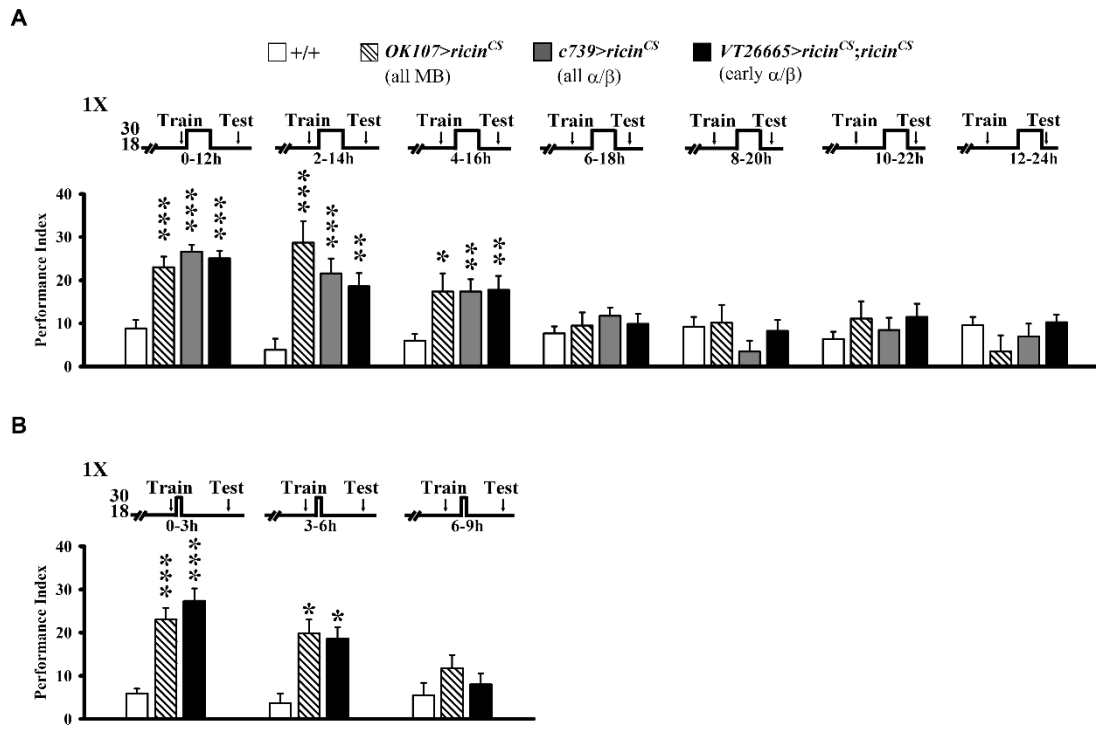

687

688 **Figure 3**

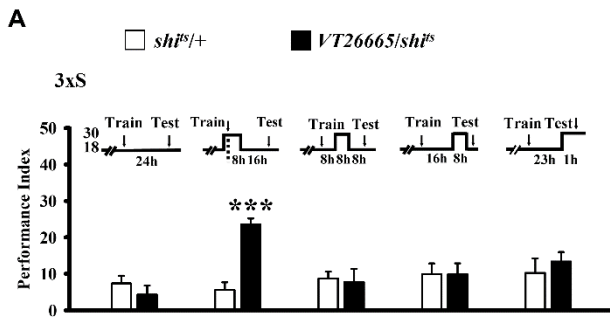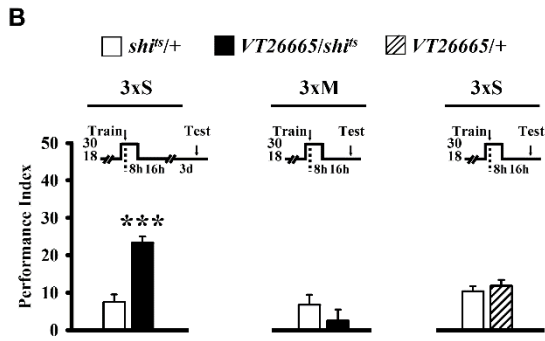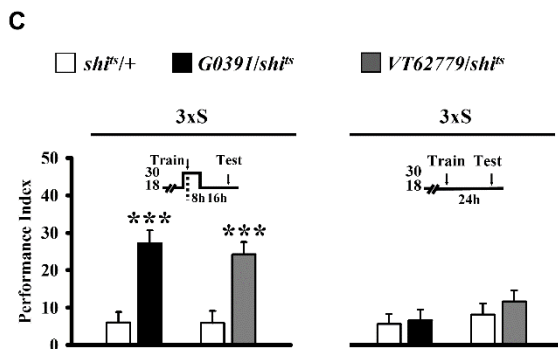

689

690 **Figure 4**

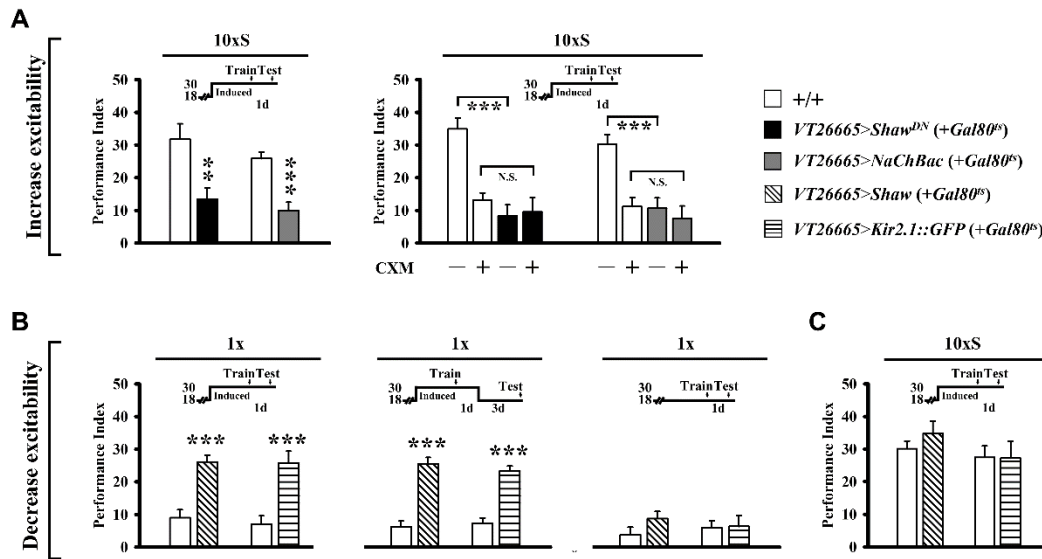

691

692 **Figure 5**



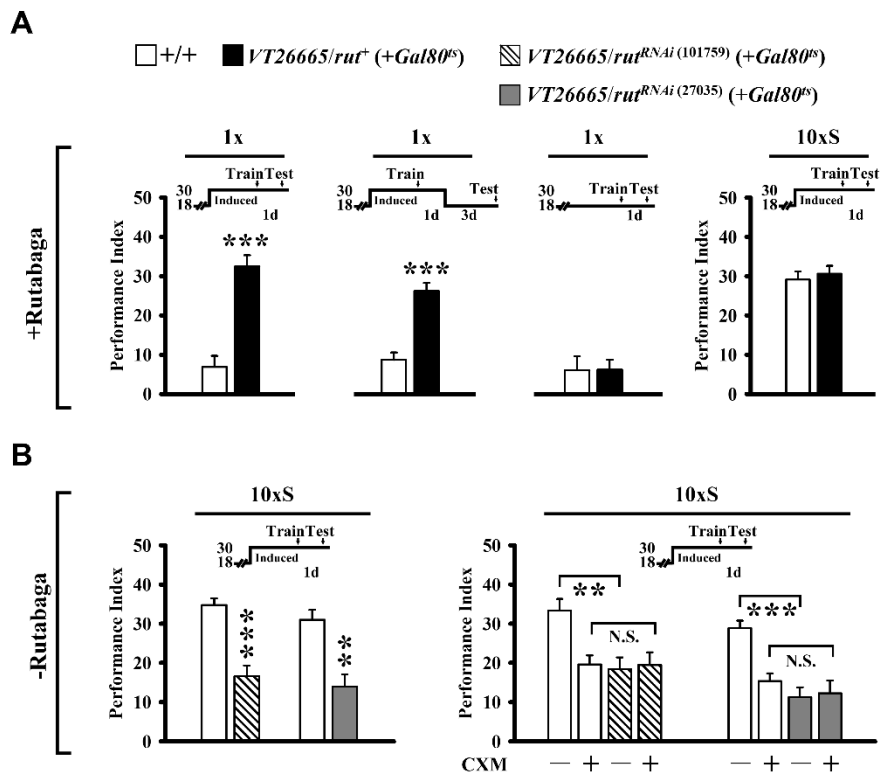

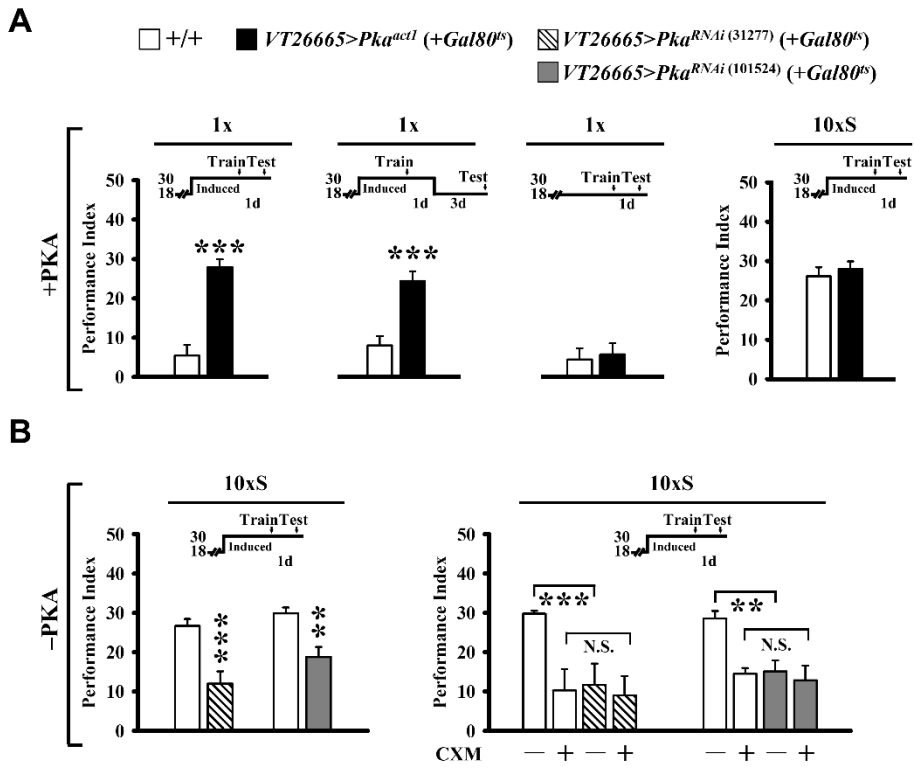

695

696 **Figure 7**

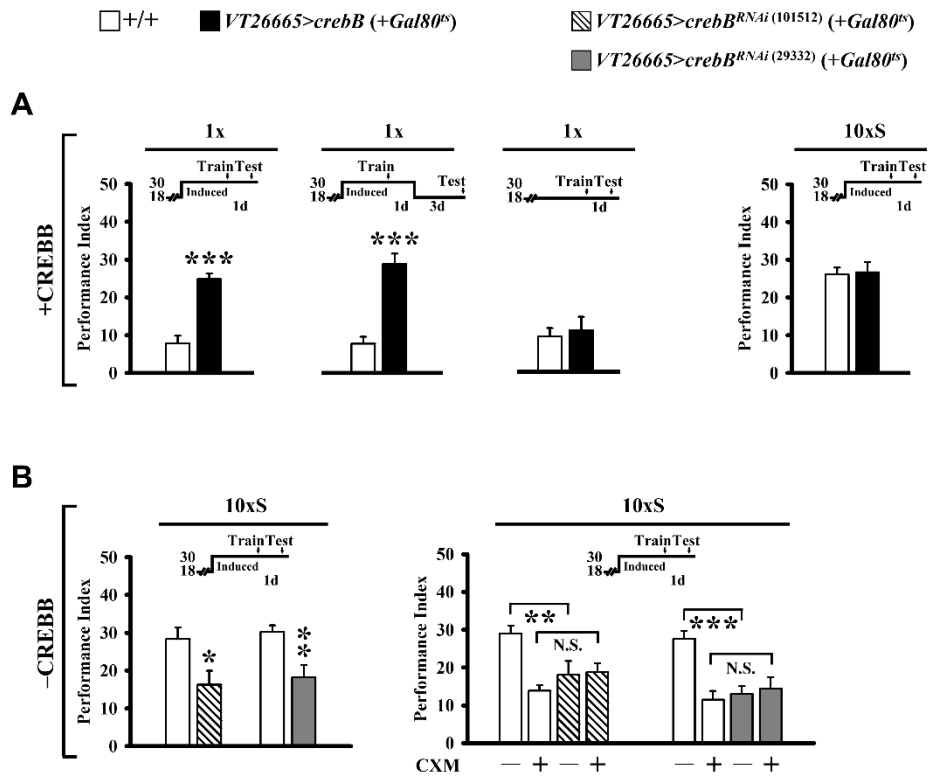

697

698 **Figure 8**

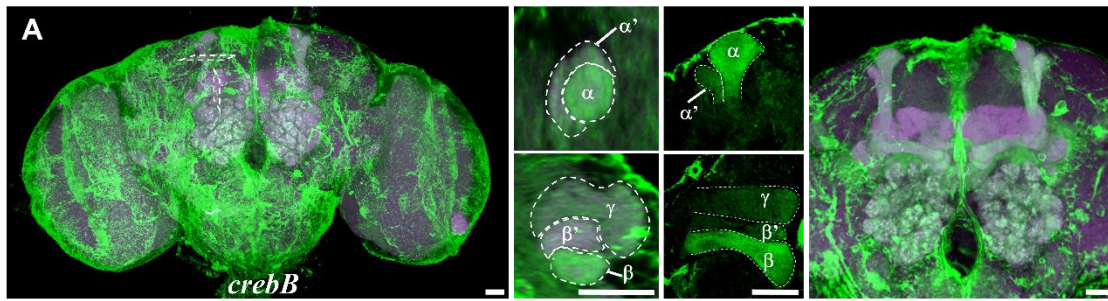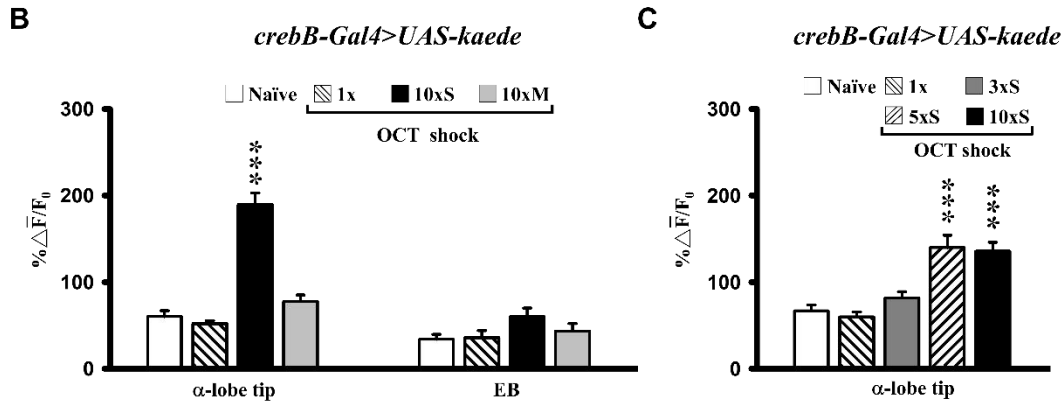

699

700 **Figure 9**

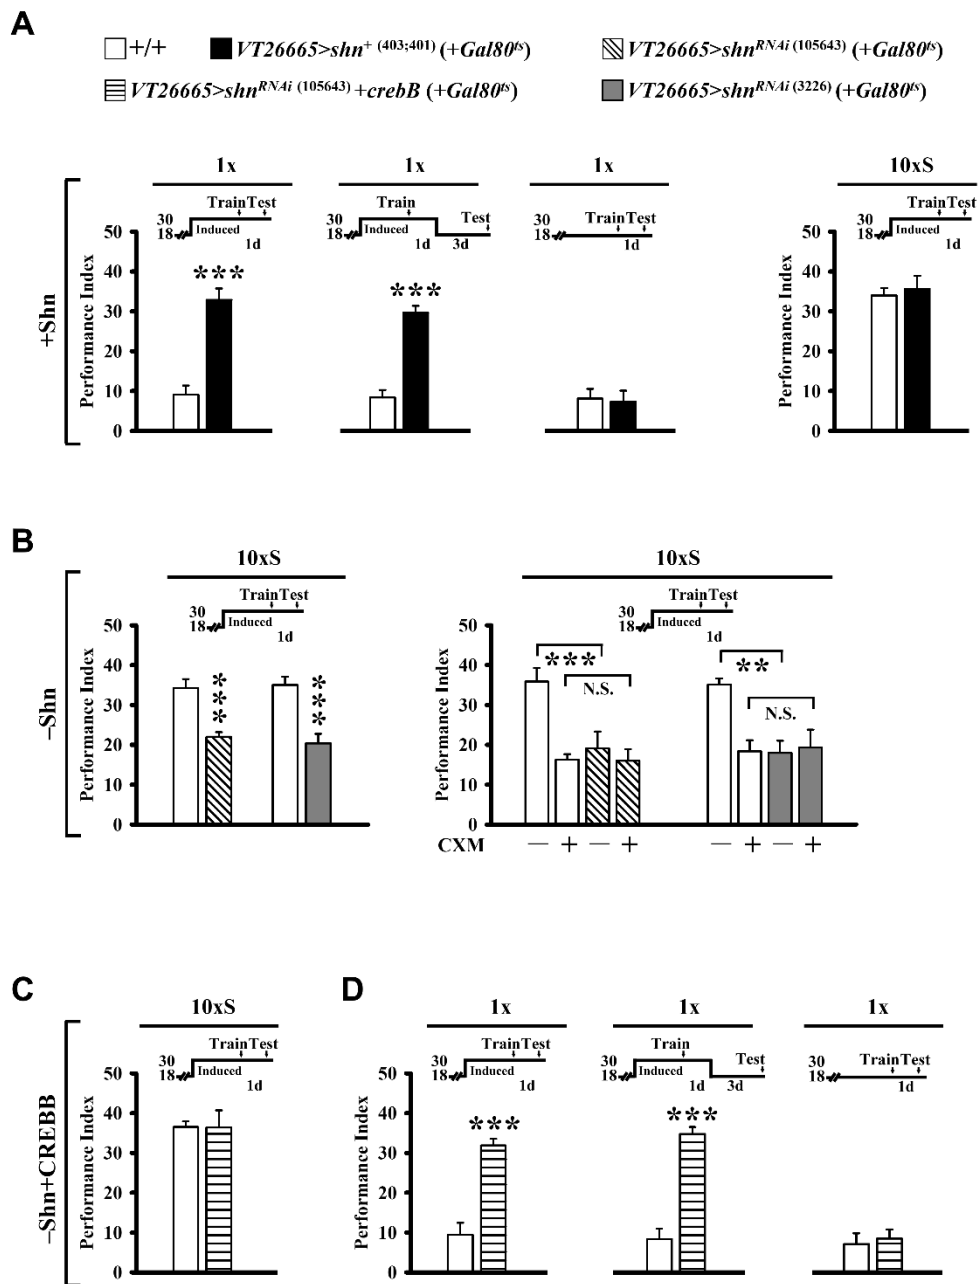

701

702 **Figure 10**

703

704

705

706

707 **Figure Legends**

708 **Figure 1. CSHL memory *Gal4* patterns in which protein synthesis inhibition has no net**  
709 **effect on LTM formation.** (A) Full expression patterns that include MB and DAL neurons (top).  
710 (B) Expression restricted from DAL neurons by *cry-Gal80* inhibition of Gal4 (center). (C)  
711 Expression restricted from MB neurons by *MB-Gal80* inhibition of Gal4 (bottom). DAL (arrow)  
712 and MB (arrowhead). (D-F) Protein synthesis inhibition in MB neurons enhances LTM  
713 formation. Effects of memory circuit *Gal4*-targeted Ricin<sup>CS</sup> on 1-day memory after three spaced  
714 training cycles (3xS), compared with wild-type (+/+) controls. Cold-sensitive Ricin<sup>CS</sup> blocks  
715 protein synthesis at the permissive temperature (30 °C) between training and testing. (D) Protein  
716 synthesis inhibition in all Gal4-expressing elements of the memory circuit has no net effect on  
717 LTM. (E) Ricin<sup>CS</sup> expression and blocking of protein synthesis in MB but not in DAL neurons  
718 (where *cry-Gal80* inhibits Gal4), enhances 1-day memory in all seven *Gal4* genotypes. (F) By  
719 contrast, Ricin<sup>CS</sup> expression and blocking of protein synthesis in DAL but not in MB neurons  
720 (where *MB-Gal80* inhibits Gal4) has no effect on LTM. In all figures, temperature control  
721 schedules are indicated (top). Memory performance indices are calculated as the normalised  
722 percent avoidance of shock-paired odour. Bars represent mean  $\pm$  SE,  $n = 8$ /bar unless stated  
723 otherwise. \*,  $P < 0.05$ ; \*\*,  $P < 0.01$ , \*\*\*,  $P < 0.001$ . All genotypes are listed in [table supplement](#)  
724 [2](#).

725 **Figure 2. Protein synthesis inhibition in early  $\alpha/\beta$  MB neurons enhances LTM formation.**

726 Effects of MB *Gal4*-targeted Ricin<sup>CS</sup> on memory after sub-threshold training compared with wild-  
727 type controls (see MB *Gal4* expression patterns in [figure supplement 2A](#)) (A) Protein synthesis  
728 inhibition in MB *Gal4* patterns that include early  $\alpha/\beta$  neurons enhance 1-day (left) and 4-day  
729 (right) memory after 3xS training. (B) Two copies of Ricin<sup>CS</sup> expressed in early  $\alpha/\beta$  neurons are  
730 necessary to enhance 1-day (left) and 4-day (right) memory after 1x training, whereas only one

731 copy of Ricin<sup>CS</sup> is insufficient. (C) Expression of inactive Ricin<sup>CS</sup> in  $\alpha/\beta$  neurons at the restrictive  
732 temperature (18 °C) has no effect on memory after 1x training.

733 **Figure 3. Protein synthesis in early  $\alpha/\beta$  neurons after subthreshold training antagonizes**  
734 **LTM formation.** Blocking protein synthesis in all MB (*OK107*), all  $\alpha/\beta$  (*c739*), and early  
735  $\alpha/\beta$  (*VT26665*) neurons 0-6 h after 1x training enhances 1-day memory compared with wild-type  
736 (+/+) controls (related to [Figure 2](#); also compare with [Figure 4A](#)). (A) Memory enhancement is  
737 significant in all groups with Ricin<sup>CS</sup> activity 0-12 h, 2-14 h and 4-16 h after training but not for  
738 later time windows. (B) Memory enhancement is significant in all groups with Ricin<sup>CS</sup> activity 0-  
739 3 h and 3-6 h but not 6-9 h after training.

740 **Figure 4. Blocking early  $\alpha/\beta$  neuron signaling enhances LTM formation.** Effects of early  
741  $\alpha/\beta$  *Gal4*-targeted Dynamin<sup>ts</sup> (*shi<sup>ts</sup>*) on 1-day memory after 3xS training. (A) Blocking signaling  
742 in the first 8-h after training enhances 1-day memory, whereas blocking signaling during  
743 subsequent 8-h windows has no effect, compared with the unexpressed *shi<sup>ts</sup>/+* control (also see  
744 [figure supplement 4](#)). (B) Similarly, blocking signaling in the first 8-h after 3xS training enhances  
745 4-day memory (left), but not after 3xM training (center) or after 3xS training of the *Gal4* driver or  
746 *shi<sup>ts</sup>* transgene alone (right). (C) Blocking early  $\alpha/\beta$  signaling using two additional *Gal4* patterns  
747 confirms this inhibitory effect and enhancement of 1-day memory (left). Memory is unaffected in  
748 flies held at the permissive temperature (18 °C) after 3xS training (right).

749 **Figure 5. Neural membrane excitability in early  $\alpha/\beta$  neurons bi-directionally regulates LTM**  
750 **formation.** MB early  $\alpha/\beta$  *Gal4*-targeted expression of K<sup>+</sup> and Na<sup>+</sup> channel proteins is induced at  
751 the restrictive temperature for the *tub-Gal80<sup>ts</sup>* inhibitor (30 °C) from five days before training  
752 until testing. (A) *Shaw<sup>DN</sup>* and *NaChBac* overexpression increase neural activity and impair 1-day  
753 memory after 10xS training (left). The same LTM is similarly blocked by systemic protein  
754 synthesis inhibition induced by CXM feeding (right) (also see [figure supplement 5](#)). (B) In

755 contrast, *Shaw* and *Kir2.1::GFP* overexpression decrease neural activity and enhance 1-day  
756 memory after only 1x training (left), which endures for at least 4 days (center). Memory is  
757 unaffected in these flies held at the permissive temperature for *tub-Gal80<sup>ts</sup>* (18 °C) after 1x  
758 training (right). (C) Decreasing neural activity as in (B) does not affect 1-day memory after 10xS  
759 training.

760 **Figure 6. Modulation of Rutabaga (AC) in early  $\alpha/\beta$  neurons bi-directionally regulates LTM**

761 **formation.** (A) Overexpressing AC in early  $\alpha/\beta$  neurons enhances 1-day memory after 1x  
762 training (left) and lasts at least four days (left center). Memory is unaffected in these flies held at  
763 the permissive temperature for *tub-Gal80<sup>ts</sup>* (18 °C) after 1x training (right center). One-day  
764 memory is unaffected in these flies held at 30 °C after 10xS training (right). *Gal4*-targeted *rut<sup>+</sup>*  
765 overexpression is induced at the restrictive temperature for *tub-Gal80<sup>ts</sup>* (30 °C) from five days  
766 prior to training until testing. (B) By contrast, adult-stage specific RNAi down-regulation of AC  
767 in early  $\alpha/\beta$  neurons (*two independent RNAi lines*) impairs 1-day memory after 10xS training  
768 (left) (also see [figure supplement 6](#)). The same LTM is similarly blocked by systemic protein  
769 synthesis inhibition induced by cycloheximide (CXM) feeding (right).

770 **Figure 7. Modulation of PKA in early  $\alpha/\beta$  neurons bi-directionally regulates LTM**

771 **formation.** (A) Overexpressing constitutively active PKA<sup>act1</sup> in early  $\alpha/\beta$  neurons enhances 1-day  
772 memory after only 1x training (left) and lasts at least four days (left center). Memory is unaffected  
773 in these flies held at the permissive temperature for *tub-Gal80<sup>ts</sup>* (18 °C) after 1x training (right  
774 center). One-day memory is unaffected in these flies held at 30 °C after 10xS training (right).  
775 *Gal4*-targeted PKA<sup>act1</sup> overexpression is induced at the restrictive temperature for *tub-Gal80<sup>ts</sup>* (30  
776 °C) from five days prior to training until testing. (B) By contrast, adult-stage specific RNAi  
777 down-regulation of PKA in early  $\alpha/\beta$  neurons (*two independent RNAi lines*) impairs 1-day  
778 memory after 10xS training (left) (also see [figure supplement 6](#)). The same LTM is similarly



779 blocked by systemic protein synthesis inhibition induced by cycloheximide (CXM) feeding  
780 (right).

781 **Figure 8. Modulation of CREBB protein in early  $\alpha/\beta$  neurons bi-directionally regulates**  
782 **LTM formation.** (A) Overexpressing CREBB proteins in early  $\alpha/\beta$  neurons enhances 1-day  
783 memory after only 1x training (left) and lasts at least four days (center). *Gal4*-targeted *crebB*  
784 overexpression is induced at the restrictive temperature for *tub-Gal80<sup>ts</sup>* (30 °C) from five days  
785 before training until testing. Memory is unaffected in these flies held at the permissive  
786 temperature for *tub-Gal80<sup>ts</sup>* (18 °C) after 1x training (right). One-day memory is also unaffected  
787 in these flies held at 30 °C after 10xS training. (B) By contrast, adult-stage specific RNAi down-  
788 regulation of CREBB proteins in early  $\alpha/\beta$  neurons (*with two independent RNAi constructs*)  
789 *impairs* 1-day memory after 10xS training (left) (also see [figure supplement 6](#)). The same LTM is  
790 similarly blocked by systemic protein synthesis inhibition induced by CXM feeding (right).

791 **Figure 9. Spaced training activates *crebB* transcription.** (A) CREBB expression visualized in  
792 dissected brains with *crebB-Gal4* driven *UAS-mCD8::GFP* (green), counterstained with DLG-  
793 antibody immunostaining (magenta), and viewed under a confocal microscope. Cross sections of  
794 vertical and horizontal MB lobes (center) show more prominent expression in  $\alpha/\beta$  neurons than in  
795  $\alpha'/\beta'$  and  $\gamma$  neurons (labeled). Scale bar = 10  $\mu$ m. (B-C) Promotor activation of *crebB* 24 h after  
796 training reported by *de novo* Kaede synthesis, estimated by the ratio of new (green, 488 nm) and  
797 preexisting (red, 561 nm) protein ( $\% \Delta F / \bar{F}_0$ ). For each brain, single optical slices through the  
798 MB  $\alpha$ -lobe tip or ellipsoid body (EB) were imaged under identical conditions. (B) Spaced  
799 training stimulates *crebB* activity preferentially in the  $\alpha$ -lobe, in comparison with EB controls.  
800 (C) A minimum of 5xS training cycles are necessary to observe Kaede synthesis reflecting *crebB*  
801 activity. Bars represent mean  $\pm$  SE,  $n \geq 8$ .

802 **Figure 10. Shn in early  $\alpha/\beta$  neurons regulates CREBB dependent LTM formation. (A)**  
803 Overexpressing Shn proteins in early  $\alpha/\beta$  neurons enhances 1-day memory after only 1x training  
804 (left) and lasts at least four days ((left center). *Gal4*-targeted *shn*<sup>+</sup> overexpression is induced at the  
805 restrictive temperature for *tub-Gal80<sup>ts</sup>* (30 °C) from five days before training until testing.  
806 Memory is unaffected in these flies held at the permissive temperature for *tub-Gal80<sup>ts</sup>* (18 °C)  
807 after 1x training (right center) (also see [figure supplement 7](#)). One-day memory is also unaffected  
808 in these flies held at 30 °C after 10xS training (right). **(B)** In contrast, adult-stage specific RNAi  
809 down-regulation of Shn in early  $\alpha/\beta$  neurons (*with two independent RNAi constructs*) impairs 1-  
810 day memory after 10xS training (left) (also see [figure supplement 6](#)). The same LTM is similarly  
811 blocked by systemic protein synthesis inhibition induced by CXM feeding (right). **(C)** Down-  
812 regulating Shn but co-overexpressing CREBB in early  $\alpha/\beta$  neurons does not impair 1-day  
813 memory after 10xS training. **(D)** One-day memory is enhanced after only 1x training (left) and  
814 lasts at least four days (center). Memory is unaffected in flies held at the permissive temperature  
815 for *tub-Gal80<sup>ts</sup>* (18 °C) after 1x training (right).

816  
817  
818  
819  
820  
821  
822  
823  
824  
825  
826  
827  
828  
829  
830

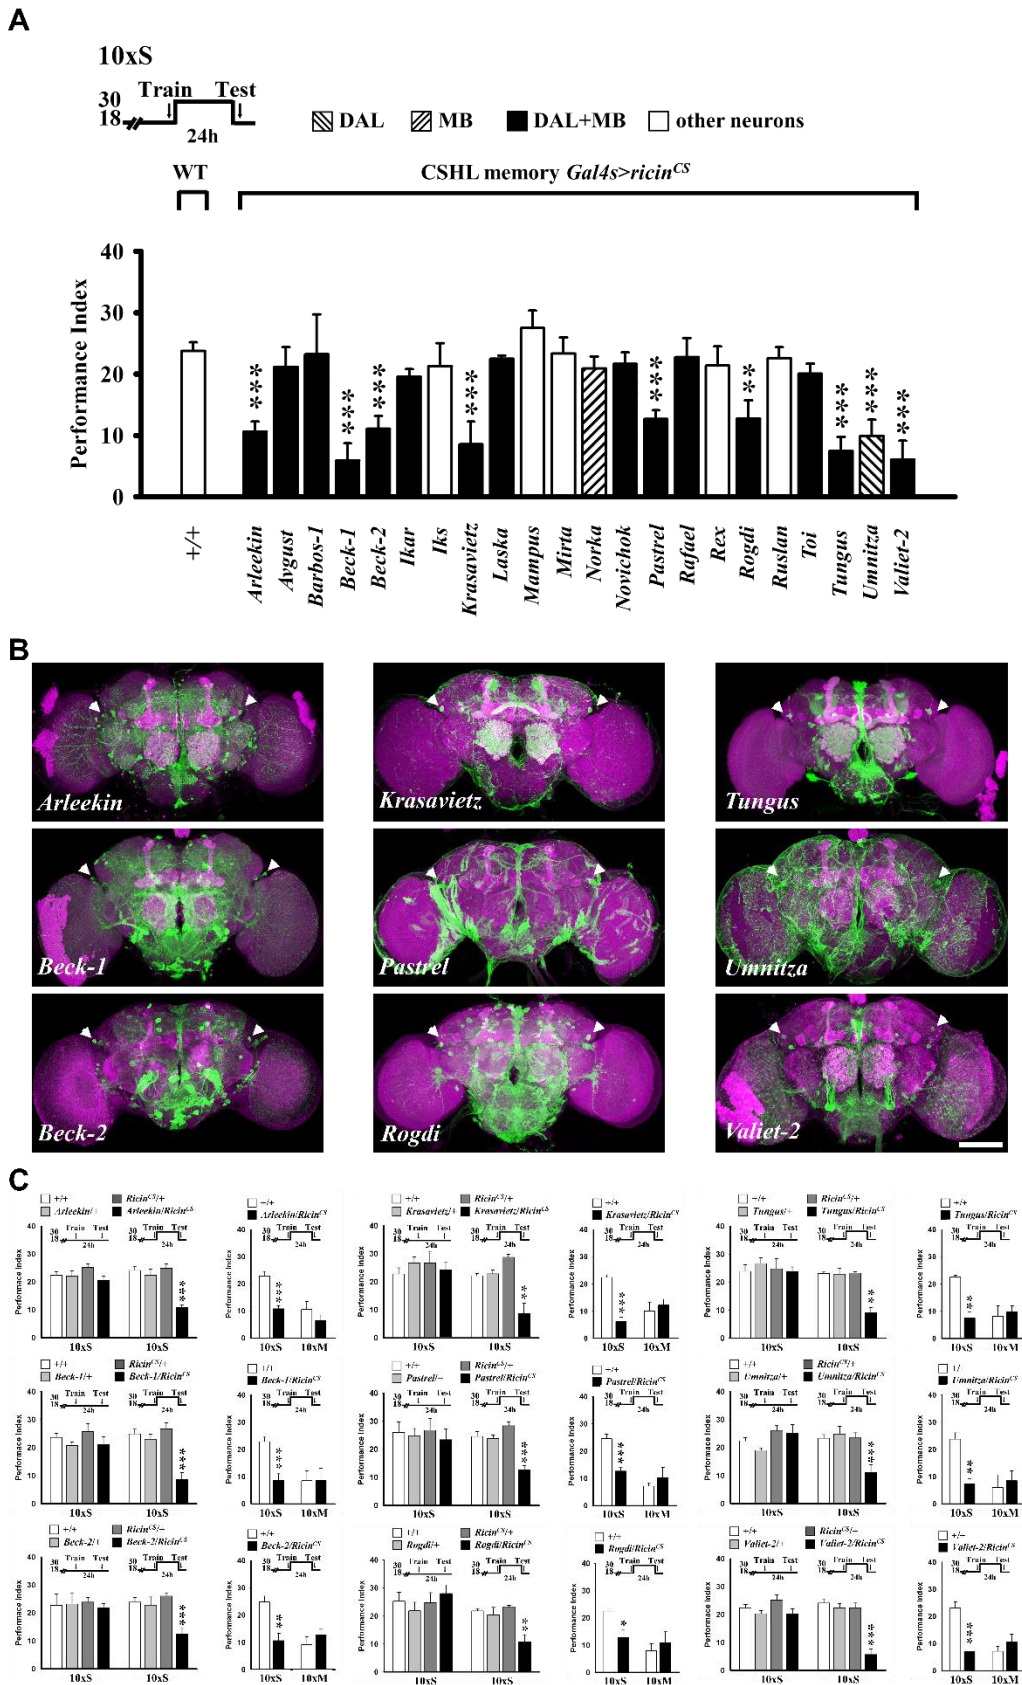

831

832 **Figure supplement 1. Protein synthesis inhibition in MB and DAL neurons blocks LTM formation. (A) Effects**  
 833 **of memory circuit *Gal4*-targeted Ricin<sup>CS</sup> on 1-day memory after ten spaced training cycles (10xS), compared with**  
 834 **wild-type (+/+) controls. Cold-sensitive Ricin<sup>CS</sup> blocks protein synthesis at the permissive temperature (30 °C)**

835 between training and testing. Inhibition of protein synthesis in eight of 22 *Gal4*-expressing patterns that include both  
836 MB and DAL neurons and one that includes DAL but not MB neurons (*Umnitza*) blocks 1-day memory.  
837 Interestingly, inhibition of protein synthesis in seven other *Gal4*-expressing patterns that include both MB and DAL  
838 neurons (related to [Figure 1](#)) and one that includes MB but not DAL neurons (*Norka*) have no net effect on LTM. **(B)**  
839 Nine *Gal4* expression patterns in which protein synthesis inhibition blocks 1-day memory **(A)**. **(C)** We observe no  
840 LTM effects after Ricin<sup>CS</sup> expression in patterns shown above **(B)** at the restrictive temperature (18 °C) or in flies  
841 expressing the nine *Gal4* drivers or *ricin*<sup>CS</sup> transgene alone (left). Ricin<sup>CS</sup> expression in all nine patterns has no effect  
842 on 1-day memory after 10xM training (right).

843 In all Extended Data figures, temperature control schedules for behavior experiments are indicated (top). Memory  
844 performance indices are calculated as the normalized percent avoidance of shock-paired odor. Bars represent mean ±  
845 SE,  $n = 8/\text{bar}$  unless otherwise noted. \*,  $P < 0.05$ ; \*\*,  $P < 0.01$ , \*\*\*,  $P < 0.001$ . All images of dissected brains show  
846 *Gal4*-driven *UAS-mCD8::GFP* (green), counterstained with DLG-antibody immunostaining (magenta), as viewed  
847 under a confocal microscope. Scale bar = 50 μm unless otherwise noted. All fly genotypes are listed in [table](#)  
848 [supplement 1](#).

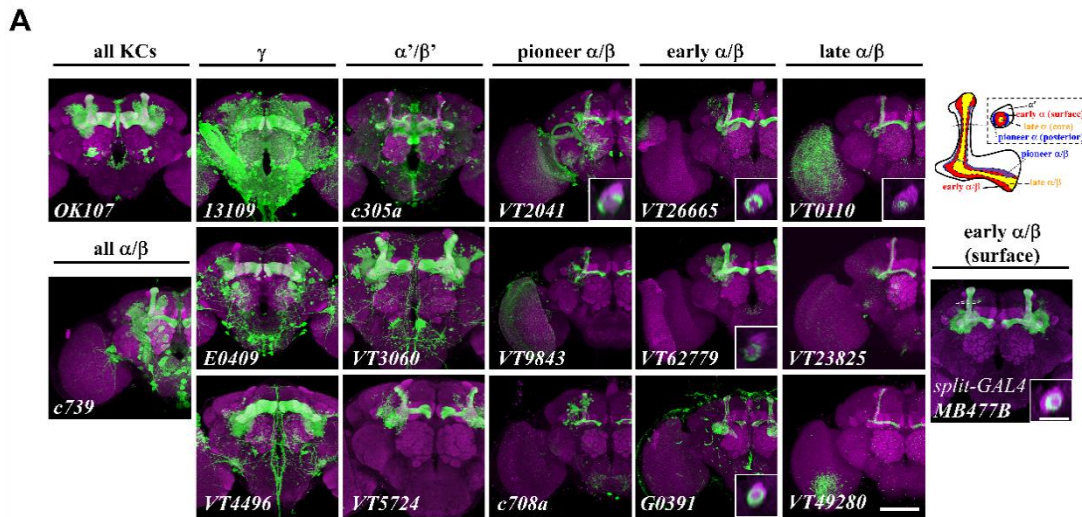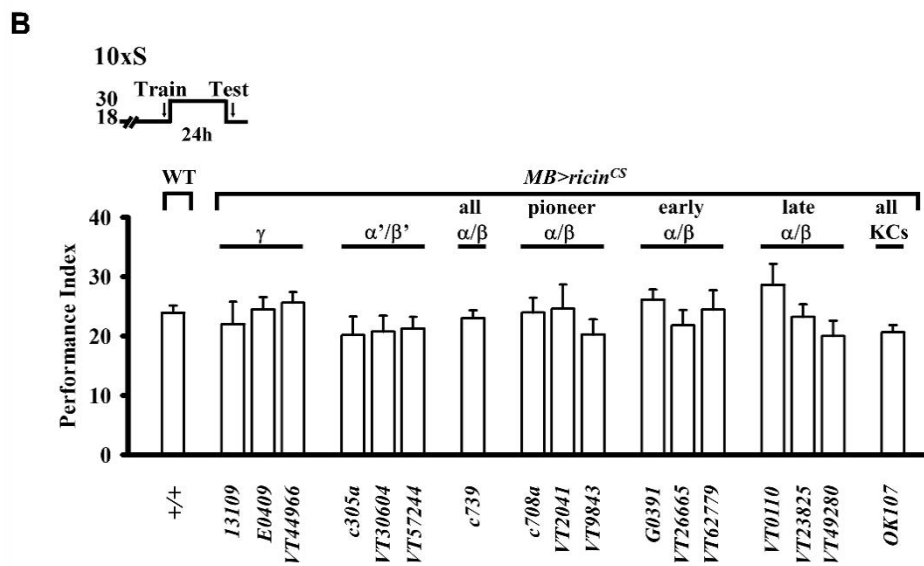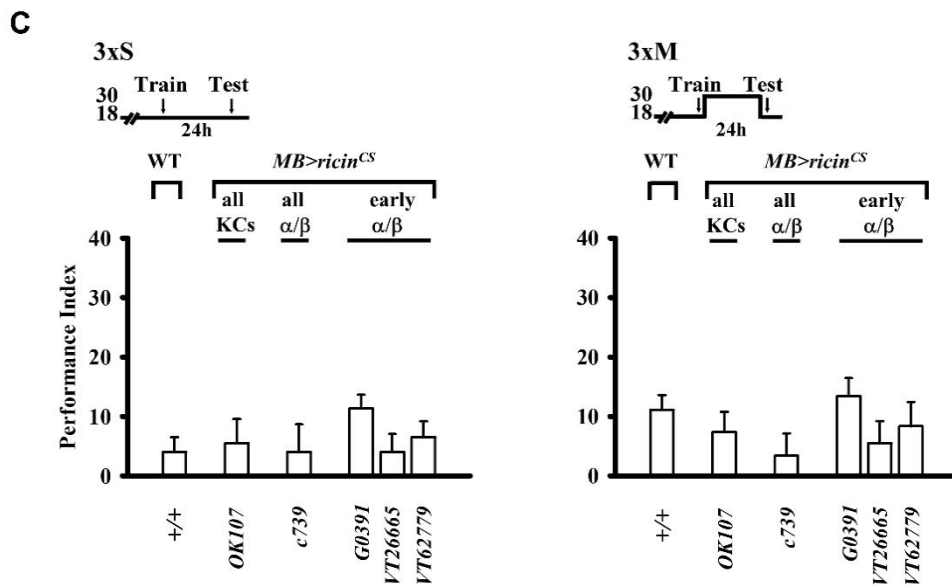

849

850 **Figure supplement 2. Protein synthesis inhibition in MB neurons does not affect LTM formation after 10xS**

851 **training.** (A) *Gal4* expression patterns that delineate five genetically and developmentally distinct MB neuron

852 subtypes. Spatial distributions of three  $\alpha/\beta$  neuron subtypes shown in a schematic representation (right) and in cross  
853 section at the vertical lobes (inset). MB *split-Gal4 MB477B* shows specific expression in early  $\alpha/\beta$  (surface) neurons.  
854 Scale bar (inset) = 10  $\mu\text{m}$ . **(B)** Effects of MB *Gal4*-targeted Ricin<sup>CS</sup> on memory compared with wild-type controls  
855 (related to [Figure 2](#)). Blocking protein synthesis in MB neurons after 10xS training has no effect on LTM (compare  
856 with the memory enhancing effects of protein synthesis inhibition in early  $\alpha/\beta$  neurons after 3xS and 1x training,  
857 [Figure 2](#)). **(C)** Ricin<sup>CS</sup> expression in MBs neurons has no effect on memory at the restrictive temperature (18 °C) after  
858 3xS training (left), or at the permissive temperature (30 °C) after 3xM training (right).

859

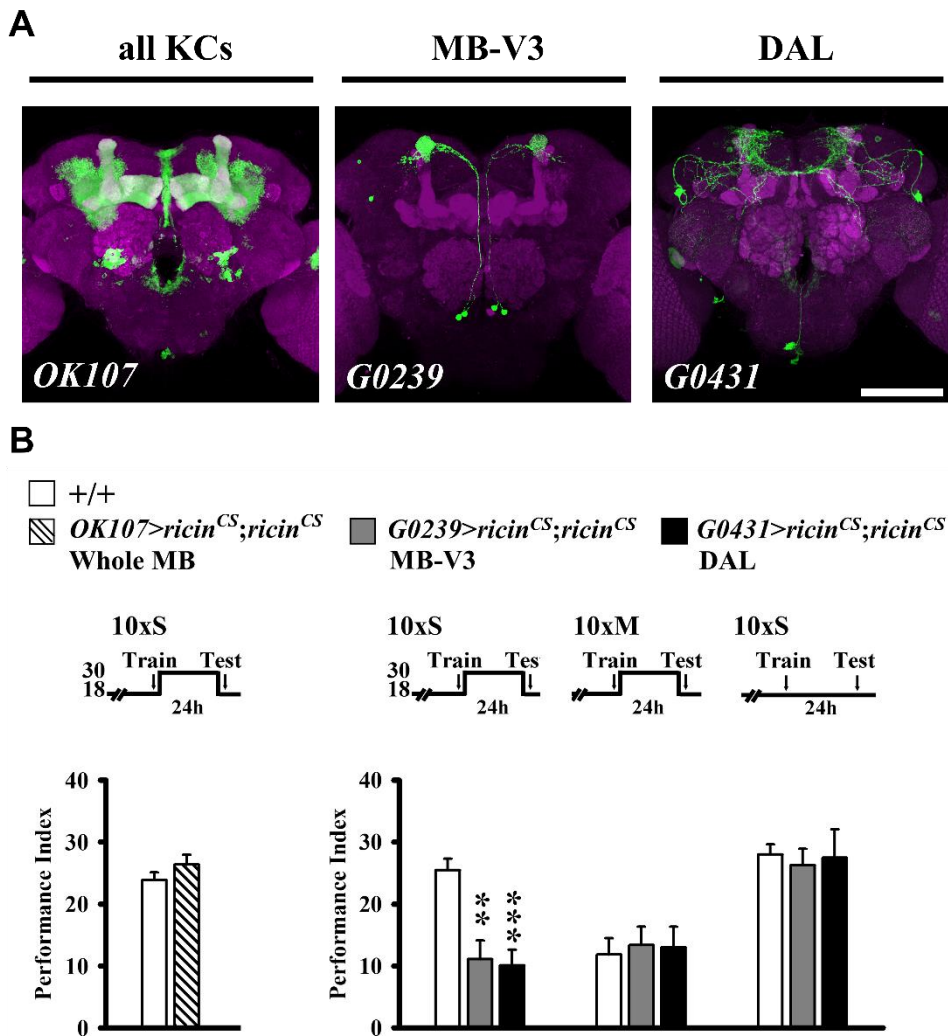

860

861 **Figure supplement 3. Protein synthesis inhibition in specific extrinsic MB neurons blocks LTM formation.** (A)  
 862 *Gal4* expression patterns that delineate intrinsic MB neurons and extrinsic MB-V3 and DAL neurons. (B) Blocking  
 863 protein synthesis in MB neurons with two copies of active Ricin<sup>CS</sup> has no effect on LTM after 10xS training (left). By  
 864 contrast, blocking protein synthesis in MB-V3 or DAL neurons inhibits LTM after 10xS training (right), but not after  
 865 10xM training or after 10xS training when flies are held at the restrictive temperature (18 °C).

866

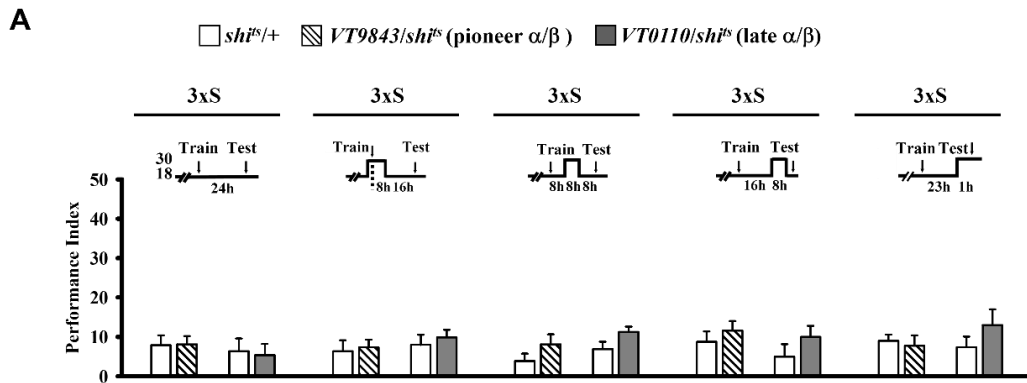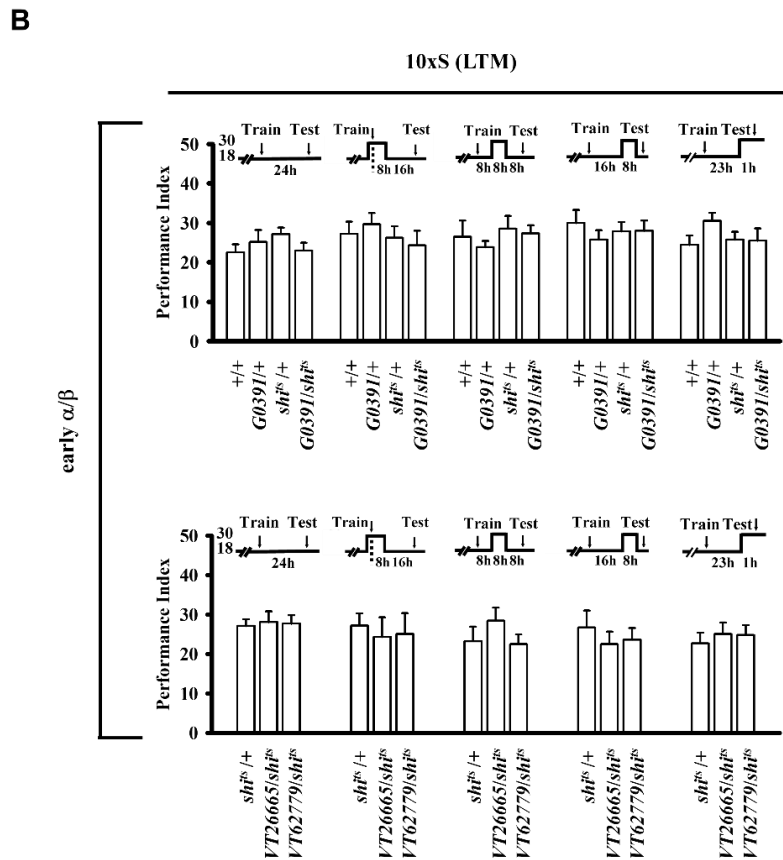

867

868 **Figure supplement 4. Blocking transmission from MB neurons and effects on LTM formation.** Effects of  
 869  $\alpha/\beta$  *Gal4*-targeted Dynamin<sup>ts</sup> (*shi<sup>ts</sup>*) on 1-day memory. (A) Blocking neural transmission from pioneer and late  $\alpha/\beta$   
 870 neurons during sequential 8-h time windows after subthreshold 3xS training has no effect on memory. (B) Blocking  
 871 neural transmission from early  $\alpha/\beta$  neurons during sequential 8-h time windows after 10xS training has no effect on  
 872 memory. By comparison, blocking transmission from early  $\alpha/\beta$  neurons after 3xS training enhances memory (Figure  
 873 4).



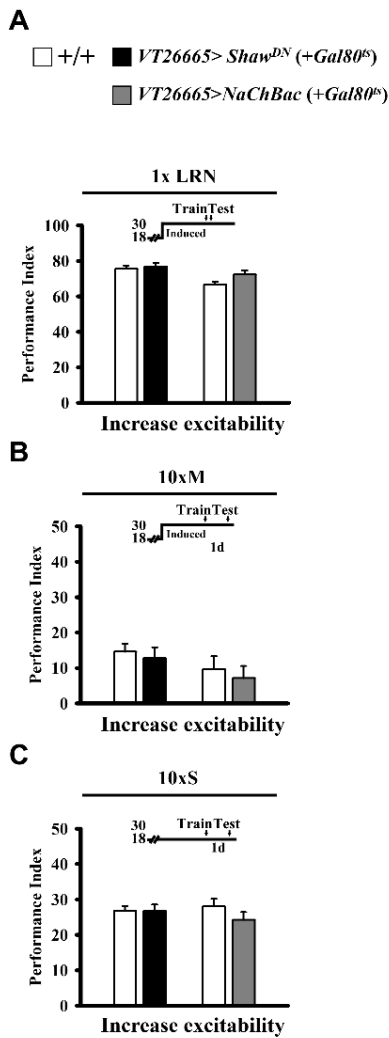

874

875 **Figure supplement 5. Increasing membrane excitability in early  $\alpha/\beta$  neurons and effects on memory formation.**

876 Early  $\alpha/\beta$  *Gal4*-targeted expression of  $K^+$  and  $Na^+$  channel proteins is induced at the restrictive temperature for the  
877 *tub-Gal80<sup>ts</sup>* inhibitor (30 °C) from five days prior to training until testing. Experimental groups are compared with  
878 wild-type (+/+) controls. (A) *Shaw<sup>DN</sup>* and *NaChBac* overexpression increase neural activity in early  $\alpha/\beta$  neurons but  
879 have no effects on immediate memory after 1x training. (B) Similarly, elevated neural activity has no effect on 1-day  
880 memory after 10xM training. By comparison, elevated neural activity impairs 1-day memory after 10xS training  
881 (Figure 5). (C) Channel proteins are not induced in flies maintained at the permissive temperature for the *tub-Gal80<sup>ts</sup>*  
882 inhibitor (18 °C) and show no differences in memory after 10xS training.

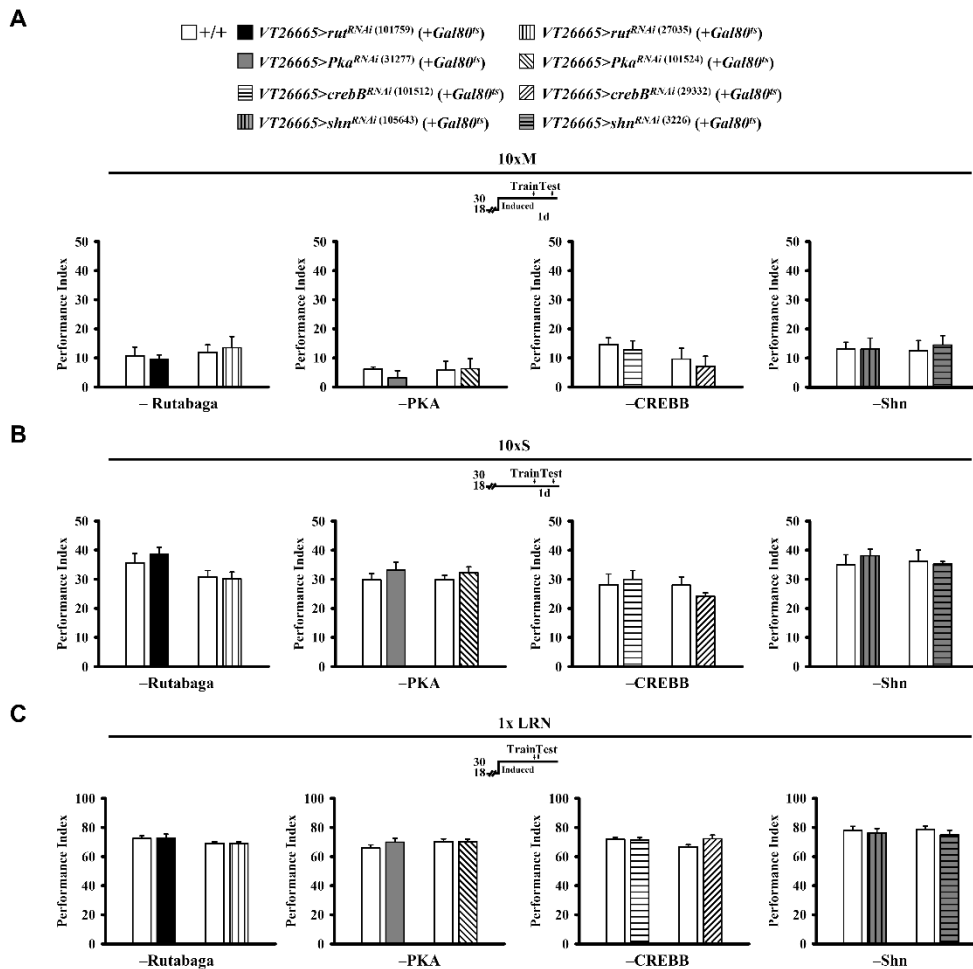

883

884 **Figure supplement 6. Down-regulation of CREBB, Rutabaga (AC), PKA and Schnurri (Shn) in early**  
 885  **$\alpha/\beta$  neurons and effects on memory formation.** (A) Adult-stage specific RNAi down-regulation of these proteins  
 886 (encoded by *rut*, *Pka*, *crebB* and *shn*) in early  $\alpha/\beta$  neurons (two RNAi constructs each) have no effects on 1-day  
 887 memory after 10xM training. *Gal4*-targeted RNAi specific for each gene is induced at the restrictive temperature for  
 888 *tub-Gal80<sup>ts</sup>* (30 °C) from five days prior to training until testing. Experimental groups are compared with wild-type  
 889 (+/+) controls. (B) Proteins are not down-regulated in flies maintained at the permissive temperature for the *tub-*  
 890 *Gal80<sup>ts</sup>* inhibitor (18 °C) and there are no differences in memory in comparison with control flies after 10xS training.  
 891 (C) Down regulation of all proteins in early  $\alpha/\beta$  neurons has no effect on immediate memory after 1x training. By  
 892 comparison, overexpressing AC, PKA, CREBB and Shn in early  $\alpha/\beta$  neurons enhances 1-day memory after only 1x  
 893 training (Figure 6-8 and 10).

894

□ +/+   ▨ *VT26665/crebA*<sup>+</sup> (+*Gal80<sup>ts</sup>*)   ■ *VT26665/shn*<sup>+</sup> (403;401) (+*Gal80<sup>ts</sup>*)  
 ▨ *VT26665>crebA<sup>RNAi</sup>* (110650) (+*Gal80<sup>ts</sup>*)

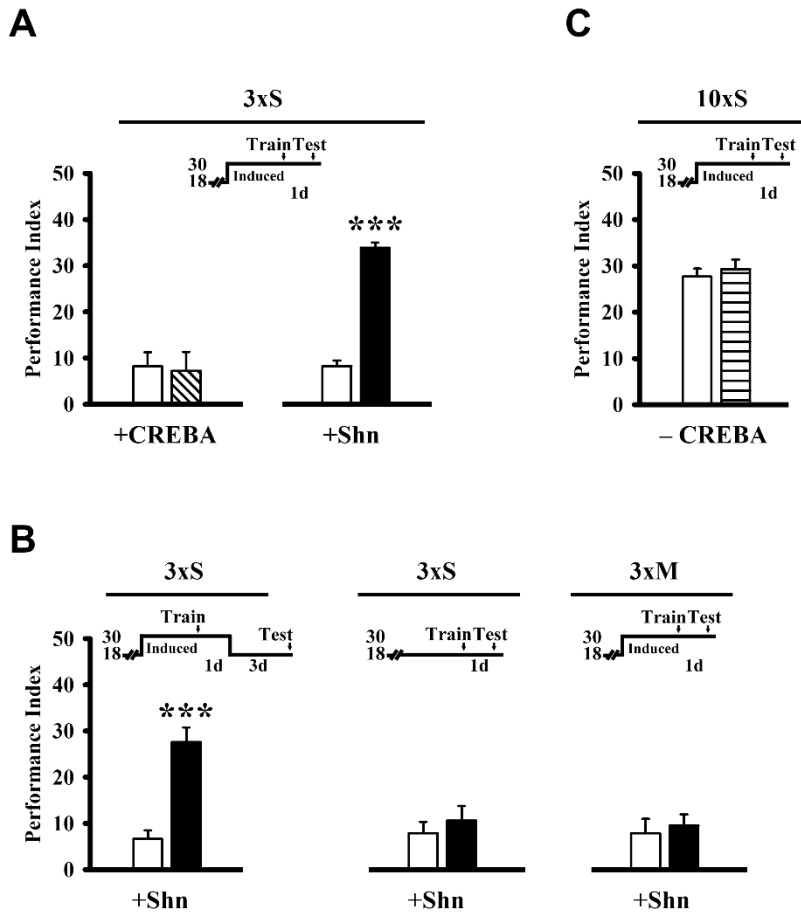

895

896 **Figure supplement 7. Overexpression of Shn but not CREBA protein in early  $\alpha/\beta$  neurons enhances LTM**

897 **formation.** (A) Overexpressing Shn but not CREBA in early  $\alpha/\beta$  neurons enhances 1-day memory after 3xS training.

898 *Gal4*-targeted *crebA* or *shn* overexpression is induced at the restrictive temperature for *tub-Gal80<sup>ts</sup>* (30 °C) from five

899 days prior to training until testing. (B) Enhanced memory lasts at least four days (left). Memory is unaffected in these

900 flies held at the permissive temperature for *tub-Gal80<sup>ts</sup>* (18 °C) after 3xS training (center), or at the restrictive

901 temperature (30 °C) after 3xM training (right). (C) Adult-stage specific down-regulation of CREBA protein in early

902  $\alpha/\beta$  neurons *has no effect on* 1-day memory after 10xS training.

903

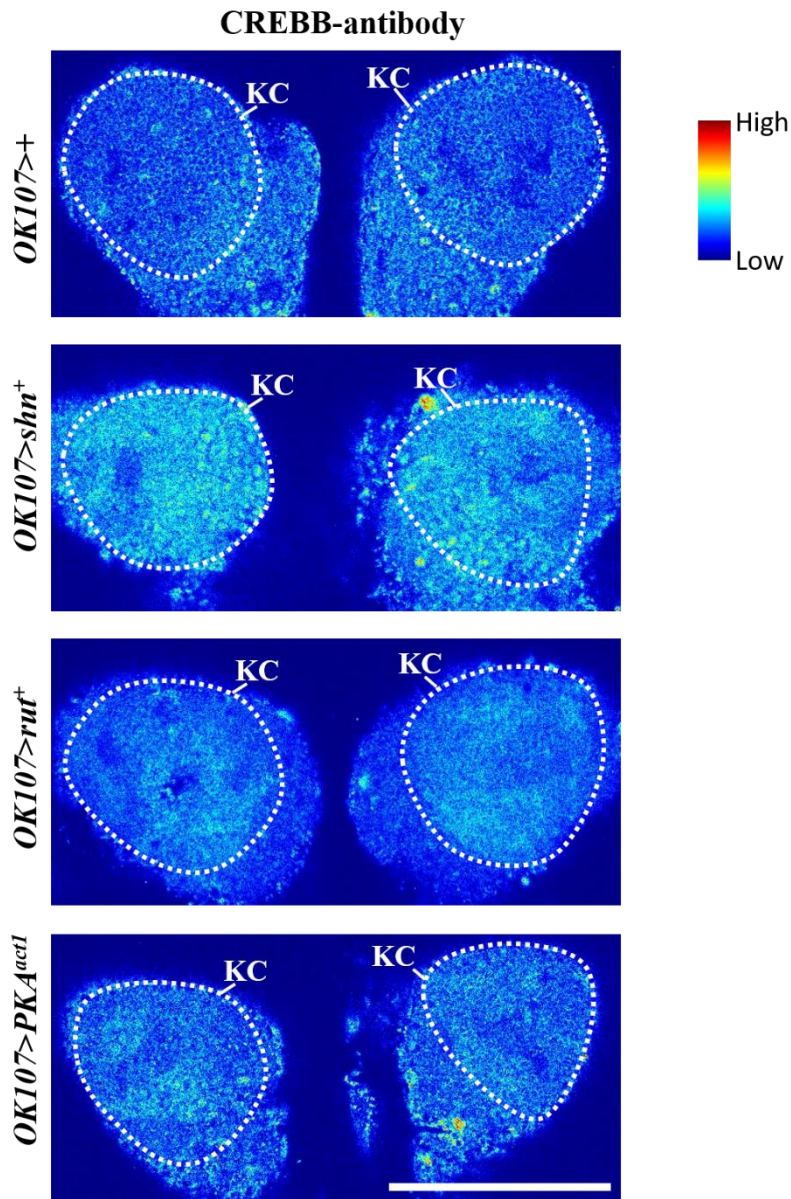

905 **Figure supplement 8. Transgene over-expression and CREBB protein levels in MB Kenyon cells.** *Gal4-OK107-*  
906 *driven shn* over-expression led to elevated CREBB protein levels (second from top) in comparison with the control  
907 (top). Over-expression of *rut* and *PKA* had only minor impact on CREBB expression (second from bottom and  
908 bottom, respectively). Confocal images of *Drosophila* MB Kenyon cell bodies (encircled by the white dotted line)  
909 show the intensity of CREBB immunostaining in a jet colormap.

910  
911  
912  
913  
914

|                   | $\gamma d$ | $\gamma m$ | $\alpha'/\beta'ap$ | $\alpha'/\beta'm$ | $\alpha/\beta$<br>pioneer<br>(posterior) | $\alpha/\beta$<br>early<br>(surface) | $\alpha/\beta$<br>late<br>(core) | DAL | EB  |
|-------------------|------------|------------|--------------------|-------------------|------------------------------------------|--------------------------------------|----------------------------------|-----|-----|
| <b>Av gust</b>    | -          | +          | -                  | -                 | -                                        | ++                                   | +++                              | +++ | -   |
| <b>Barbos-1</b>   | -          | +          | -                  | -                 | -                                        | +++                                  | +++                              | +++ | +   |
| <b>Ikar</b>       | -          | +          | +                  | +                 | -                                        | +++                                  | +++                              | +++ | +++ |
| <b>Laska</b>      | -          | +          | +                  | +                 | -                                        | +++                                  | +++                              | +++ | ++  |
| <b>Novichok</b>   | -          | +          | -                  | -                 | -                                        | +++                                  | +++                              | +++ | +   |
| <b>Rafael</b>     | -          | ++         | -                  | -                 | -                                        | +++                                  | +++                              | +++ | -   |
| <b>Toi</b>        | -          | +          | -                  | -                 | -                                        | +++                                  | +++                              | +++ | +   |
| <b>Arleekin</b>   | -          | -          | ++                 | ++                | -                                        | ++                                   | +++                              | +++ | +   |
| <b>Beck-1</b>     | -          | -          | -                  | -                 | -                                        | -                                    | +                                | +++ | +++ |
| <b>Beck-2</b>     | -          | -          | -                  | -                 | -                                        | -                                    | +                                | +++ | +++ |
| <b>Krasavietz</b> | -          | +          | +                  | +                 | -                                        | +++                                  | +++                              | +++ | +   |
| <b>Pastrel</b>    | -          | +          | -                  | -                 | -                                        | +++                                  | +++                              | +++ | -   |
| <b>Rogdi</b>      | N.D.       | +++        | +++                | +++               | -                                        | +                                    | -                                | +++ | +++ |
| <b>Tungus</b>     | ++         | +          | -                  | -                 | -                                        | +++                                  | -                                | +++ | +++ |
| <b>Umnitza</b>    | +          | +          | -                  | -                 | -                                        | +                                    | -                                | +++ | +   |
| <b>Valiet-2</b>   | -          | -          | -                  | -                 | -                                        | -                                    | ++                               | +++ | -   |

915 **Table supplement 1. CSHL memory *Gal4* patterns.** Table shows Gal4 targeted GFP intensity was graded as strong  
916 (+++), intermediate (++) , weak (+), absence (-) or non-distinguishable (N.D.). DAL, dorsal anterior lateral neuron;  
917 EB, ellipsoid body.

918

## Fly genotypes utilized in experiments

| Symbol                       | Genotype & Chromosome                                                              | Description                                                         | Source                                |
|------------------------------|------------------------------------------------------------------------------------|---------------------------------------------------------------------|---------------------------------------|
| +/+                          | <i>Canton-S w<sup>1118</sup> (iso1CJ)</i>                                          | Wild-type                                                           | Tully et al., 1994                    |
| <b>Gal4/Gal80 Transgenes</b> |                                                                                    |                                                                     |                                       |
| <i>VT44966</i>               | <i>P{VT44966-Gal4}attP2</i> on Chr 3                                               | <i>Gal4</i> driver, strong in $\gamma$ neurons                      | VDRC <sup>a</sup>                     |
| <i>VT30604</i>               | <i>P{VT30604-Gal4}attP2</i> on Chr 3                                               | <i>Gal4</i> driver, specific in $\alpha'/\beta'$ neurons            | VDRC <sup>a</sup>                     |
| <i>VT57244</i>               | <i>P{VT57244-Gal4}attP2</i> on Chr 3                                               | <i>Gal4</i> driver, specific in $\alpha'/\beta'$ neurons            | VDRC <sup>a</sup>                     |
| <i>VT2041</i>                | <i>P{VT2041-Gal4}attP2</i> on Chr 3                                                | <i>Gal4</i> driver, specific in pioneer $\alpha/\beta$ neurons      | VDRC <sup>a</sup>                     |
| <i>VT9843</i>                | <i>P{VT9843-Gal4}attP2</i> on Chr 3                                                | <i>Gal4</i> driver, specific in pioneer $\alpha/\beta$ neurons      | VDRC <sup>a</sup>                     |
| <i>VT26665</i>               | <i>P{VT26665-Gal4}attP2</i> on Chr 3                                               | <i>Gal4</i> driver, specific in early $\alpha/\beta$ neurons        | VDRC <sup>a</sup>                     |
| <i>VT62779</i>               | <i>P{VT62779-Gal4}attP2</i> on Chr 3                                               | <i>Gal4</i> driver, specific in early $\alpha/\beta$ neurons        | VDRC <sup>a</sup>                     |
| <i>VT0110</i>                | <i>P{VT0110-Gal4}attP2</i> on Chr 3                                                | <i>Gal4</i> driver, specific in late $\alpha/\beta$ neurons         | VDRC <sup>a</sup>                     |
| <i>VT23825</i>               | <i>P{VT23825-Gal4}attP2</i> on Chr 3                                               | <i>Gal4</i> driver, specific in late $\alpha/\beta$ neurons         | VDRC <sup>a</sup>                     |
| <i>VT49280</i>               | <i>P{VT49280-Gal4}attP2</i> on Chr 3                                               | <i>Gal4</i> driver, specific in late $\alpha/\beta$ neurons         | VDRC <sup>a</sup>                     |
| <i>OK107</i>                 | <i>P{GawB}OK107</i> on Chr 4                                                       | <i>Gal4</i> driver, strong in all MB neurons                        | BDSC <sup>b</sup> ; Lin et al., 2007  |
| <i>c739</i>                  | <i>P{GawB}c739</i> on Chr 3                                                        | <i>Gal4</i> driver, strong in all $\alpha/\beta$ neurons            | BDSC <sup>b</sup> ; Lin et al., 2007  |
| <i>c305a</i>                 | <i>P{GawB}c305a</i> on Chr 1                                                       | <i>Gal4</i> driver, strong in $\alpha'/\beta'$ neurons              | BDSC <sup>b</sup> ; Lin et al., 2007  |
| <i>c708a</i>                 | <i>P{GawB}c708a</i> on Chr 1                                                       | <i>Gal4</i> driver, specific in pioneer $\alpha/\beta$ neurons      | BDSC <sup>b</sup> ; Lin et al., 2007  |
| <i>E0409 (103496)</i>        | <i>P{GawB}fru[NP0021]</i> on Chr 3                                                 | <i>Gal4</i> driver, strong in $\gamma$ neurons                      | DGRC <sup>c</sup> ; Lee et al., 2011  |
| <i>Arleekin</i>              | <i>P{GawB}Arleekin</i> on Chr 3                                                    | CSHL memory <i>Gal4</i> driver                                      | Dubnau et al., 2003                   |
| <i>Avgust</i>                | <i>P{GawB}Avgust</i> on Chr 2                                                      | CSHL memory <i>Gal4</i> driver                                      | Dubnau et al., 2003                   |
| <i>Barbos-1</i>              | <i>P{GawB}Barbos-1</i> on Chr 2                                                    | CSHL memory <i>Gal4</i> driver                                      | Dubnau et al., 2003                   |
| <i>Beck-1</i>                | <i>P{GawB}Beck-1</i> on Chr 2                                                      | CSHL memory <i>Gal4</i> driver                                      | Dubnau et al., 2003                   |
| <i>Beck-2</i>                | <i>P{GawB}Beck-2</i> on Chr 2                                                      | CSHL memory <i>Gal4</i> driver                                      | Dubnau et al., 2003                   |
| <i>Ikar</i>                  | <i>P{GawB}Ikar</i> on Chr 3                                                        | CSHL memory <i>Gal4</i> driver                                      | Dubnau et al., 2003                   |
| <i>Iks</i>                   | <i>P{GawB}Iks</i> on Chr 3                                                         | CSHL memory <i>Gal4</i> driver                                      | Dubnau et al., 2003                   |
| <i>Krasavietz</i>            | <i>P{GawB}Krasavietz</i> on Chr 3                                                  | CSHL memory <i>Gal4</i> driver                                      | Dubnau et al., 2003                   |
| <i>Laska</i>                 | <i>P{GawB}Laska</i> on Chr 3                                                       | CSHL memory <i>Gal4</i> driver                                      | Dubnau et al., 2003                   |
| <i>Mampus</i>                | <i>P{GawB}Mampus</i> on Chr 2                                                      | CSHL memory <i>Gal4</i> driver                                      | Dubnau et al., 2003                   |
| <i>Mirta</i>                 | <i>P{GawB}Mirta</i> on Chr 3                                                       | CSHL memory <i>Gal4</i> driver                                      | Dubnau et al., 2003                   |
| <i>Norka</i>                 | <i>P{GawB}Norka</i> on Chr 3                                                       | CSHL memory <i>Gal4</i> driver                                      | Dubnau et al., 2003                   |
| <i>Novichok</i>              | <i>P{GawB}Novichok</i> on Chr 3                                                    | CSHL memory <i>Gal4</i> driver                                      | Dubnau et al., 2003                   |
| <i>Pastrel</i>               | <i>P{GawB}Pastrel</i> on Chr 3                                                     | CSHL memory <i>Gal4</i> driver                                      | Dubnau et al., 2003                   |
| <i>Rafael</i>                | <i>P{GawB}Rafael</i> on Chr 3                                                      | CSHL memory <i>Gal4</i> driver                                      | Dubnau et al., 2003                   |
| <i>Rex</i>                   | <i>P{GawB}Rex</i> on Chr 2                                                         | CSHL memory <i>Gal4</i> driver                                      | Dubnau et al., 2003                   |
| <i>Rogdi</i>                 | <i>P{GawB}Rogdi</i> on Chr 3                                                       | CSHL memory <i>Gal4</i> driver                                      | Dubnau et al., 2003                   |
| <i>Ruslan</i>                | <i>P{GawB}Ruslan</i> on Chr 3                                                      | CSHL memory <i>Gal4</i> driver                                      | Dubnau et al., 2003                   |
| <i>Toi</i>                   | <i>P{GawB}Toi</i> on Chr 3                                                         | CSHL memory <i>Gal4</i> driver                                      | Dubnau et al., 2003                   |
| <i>Tungus</i>                | <i>P{GawB}Tungus</i> on Chr 2                                                      | CSHL memory <i>Gal4</i> driver                                      | Dubnau et al., 2003                   |
| <i>Umnitza</i>               | <i>P{GawB}Umnitza</i> on Chr 2                                                     | CSHL memory <i>Gal4</i> driver                                      | Dubnau et al., 2003                   |
| <i>Valiet-2</i>              | <i>P{GawB}Valiet-2</i> on Chr 2                                                    | CSHL memory <i>Gal4</i> driver                                      | Dubnau et al., 2003                   |
| <i>13109 (G0451)</i>         | <i>P{GT1}BG00015</i> on Chr 1                                                      | <i>Gal4</i> driver, strong in $\gamma$ neurons                      | BDSC <sup>b</sup> ; Lin et al., 2007  |
| <i>G0391 (12795)</i>         | <i>P{GT1}BG02525</i> on Chr 3                                                      | <i>Gal4</i> driver, specific in early $\alpha/\beta$ neurons        | BDSC <sup>b</sup> ; Lin et al., 2007  |
| <i>G0239 (12639)</i>         | <i>P{GT1}BG01228</i> on Chr 2                                                      | <i>Gal4</i> driver, specific in MB-V3 neurons                       | BDSC <sup>b</sup> ; Pai et al., 2013  |
| <i>G0431 (12837)</i>         | <i>P{GT1}BG02822</i> on Chr 3                                                      | <i>Gal4</i> driver, specific in DAL neurons                         | BDSC <sup>b</sup> ; Chen et al., 2012 |
| <i>MB477B</i>                | <i>P{R44E04-p65.AD}attP40</i> on Chr 2;<br><i>P{R26E07-GAL4.DBD}attP2</i> on Chr 3 | Split- <i>Gal4</i> driver, specific in early $\alpha/\beta$ neurons | Aso et al., 2014                      |
| <i>crebB</i>                 | <i>P{crebB-Gal4}attP40</i> on Chr 2                                                | <i>crebB</i> promoter <i>Gal4</i> driver                            | This study                            |

|                               |                                                                                                            |                                                                                        |                                                                                                           |
|-------------------------------|------------------------------------------------------------------------------------------------------------|----------------------------------------------------------------------------------------|-----------------------------------------------------------------------------------------------------------|
| <i>cry-Gal80</i>              | <i>P{cry-Gal80}</i> on Chr 3                                                                               | Inhibit Gal4 with DAL-specific ( <i>cryptochrome</i> promoter) expression of Gal80     | Stoleru et al., 2004;<br>Chen et al., 2012                                                                |
| <i>MB-Gal80</i>               | <i>P{mb247-GAL80}</i> on Chr 2                                                                             | Inhibit Gal4 with MB-specific ( <i>mb247</i> promoter) expression of Gal80             | Krashes et al., 2008                                                                                      |
| <i>tub-Gal80<sup>ts</sup></i> | <i>P{tubP-GAL80<sup>ts</sup>20}</i> on Chr 2                                                               | Inhibit Gal4 with <i>tubulin</i> promoter drive temperature-sensitive <i>Gal80</i>     | BDSC <sup>b</sup>                                                                                         |
| <b>UAS Transgenes</b>         |                                                                                                            |                                                                                        |                                                                                                           |
| <i>GFP</i>                    | <i>P{UAS-mCD8::GFP}LL5,</i><br><i>P{UAS-mCD8::GFP}2</i> on Chr 2;<br><i>P{UAS-mCD8::GFP.L}LL6</i> on Chr 3 | membrane-targeted green fluorescent protein (GFP)                                      | BDSC <sup>b</sup>                                                                                         |
| <i>Kaede</i>                  | <i>P{UAS-kaede}</i> on Chr 3                                                                               | photoconvertible fluorescent protein to report de novo protein synthesis               | Chen et al., 2012                                                                                         |
| <i>ricin<sup>CS</sup></i>     | <i>P{UAS-ricin<sup>CS</sup>}</i> on Chr 2;<br><i>P{UAS-ricin<sup>CS</sup>}</i> on Chr 3                    | cold-sensitive ribosome-inactivating toxin to acutely inhibit protein synthesis        | Pai et al., 2013;<br>Chen et al., 2012;<br>Wu et al., 2017;<br>Moffat et al., 1992;<br>Allen et al., 2002 |
| <i>shi<sup>ts</sup></i>       | <i>P{UAS-shi<sup>ts</sup>}</i> on Chr 3                                                                    | temperature-sensitive dominant-negative form of Dynamin to block synaptic transmission | Dubnau et al., 2001                                                                                       |
| <i>Shaw<sup>DN</sup></i>      | <i>P{UAS-Shaw<sup>DN</sup>}</i> on Chr 2                                                                   | dominant-negative K <sup>+</sup> channel                                               | Hodge et al., 2005                                                                                        |
| <i>NaChBac</i>                | <i>P{UAS-NaChBac}</i> on Chr 2                                                                             | bacterial Na <sup>+</sup> channel                                                      | Joiner et al., 2006                                                                                       |
| <i>Shaw</i>                   | <i>P{UAS-Shaw}</i> on Chr 2                                                                                | K <sup>+</sup> channel                                                                 | Hodge et al., 2005                                                                                        |
| <i>Kir2.1::GFP</i>            | <i>P{UAS-Kir2.1::GFP}</i> on Chr 3                                                                         | inward-rectifying K <sup>+</sup> channel; PIP2 dependent                               | Joiner et al., 2006                                                                                       |
| <i>crebB</i>                  | <i>P{UAS-crebB}</i> on Chr 3                                                                               | cAMP response element binding protein (crebB)                                          | BDSC <sup>b</sup>                                                                                         |
| <i>rut<sup>+</sup></i>        | <i>P{UAS-rut}2</i> on Chr 2;<br><i>P{UAS-rut}1</i> on Chr 3                                                | wild type rutabaga <sup>+</sup> , adenylyl cyclase (AC)                                | BDSC <sup>b</sup>                                                                                         |
| <i>Pka<sup>act1</sup></i>     | <i>P{UAS-Pka<sup>act1</sup>}</i> on Chr 2                                                                  | constitutively active subunit of cAMP-dependent protein kinase (PKA)                   | Joiner et al., 2006                                                                                       |
| <i>crebA<sup>+</sup></i>      |                                                                                                            | cAMP response element binding protein (crebA)                                          | BDSC <sup>b</sup>                                                                                         |
| <i>shn<sup>+</sup></i>        | <i>P{UAS-shn}403</i> on Chr 2;<br><i>P{UAS-shn}401</i> on Chr 3                                            | wild type schnurri <sup>+</sup> , zinc finger C2H2 transcription factor                | Marty et al., 2000                                                                                        |
| <i>v101512</i>                | <i>P{KK108927}VIE-260B</i> on Chr 2                                                                        | crebB RNA interference                                                                 | VDRC <sup>a</sup>                                                                                         |
| <i>v101759</i>                | <i>P{KK109441}VIE-260B</i> on Chr 2                                                                        | rutabaga (AC) RNA interference                                                         | VDRC <sup>a</sup>                                                                                         |
| <i>v101524</i>                | <i>P{KK108966}VIE-260B</i> on Chr 2                                                                        | Pka RNA interference                                                                   | VDRC <sup>a</sup>                                                                                         |
| <i>v105643</i>                | <i>P{KK101278}VIE-260B</i> on Chr 2                                                                        | schnurri RNA interference                                                              | VDRC <sup>a</sup>                                                                                         |
| <i>v3226</i>                  | <i>P{GD1644}v3226</i> on Chr 3                                                                             | schnurri RNA interference                                                              | VDRC <sup>a</sup>                                                                                         |
| <i>29332</i>                  | <i>P{TRiP.JF02494}attP2</i> on Chr 3                                                                       | crebB RNA interference                                                                 | BDSC <sup>b</sup>                                                                                         |
| <i>27035</i>                  | <i>P{TRiP.JF02361}attP2</i> on Chr 3                                                                       | rutabaga (AC) RNA interference                                                         | BDSC <sup>b</sup>                                                                                         |
| <i>31277</i>                  | <i>P{TRiP.JF01218}attP2</i> on Chr 3                                                                       | PKA RNA interference                                                                   | BDSC <sup>b</sup>                                                                                         |

<sup>a</sup> Vienna *Drosophila* Resource Center; <sup>b</sup> Bloomington *Drosophila* Stock Center; <sup>c</sup> KYOTO Stock Center.

**Table supplement 2. Fly genotypes used in this study.** Table shows all fly genotypes, descriptions and sources used in this study, grouped by distinct types of transgenes. References are listed in Methods.
